# Supplementary material
Source: publisher figshare collection journal article supplement (https://acs.figshare.com/ndownloader/files/3708193)

Intensity (arbitrary units)

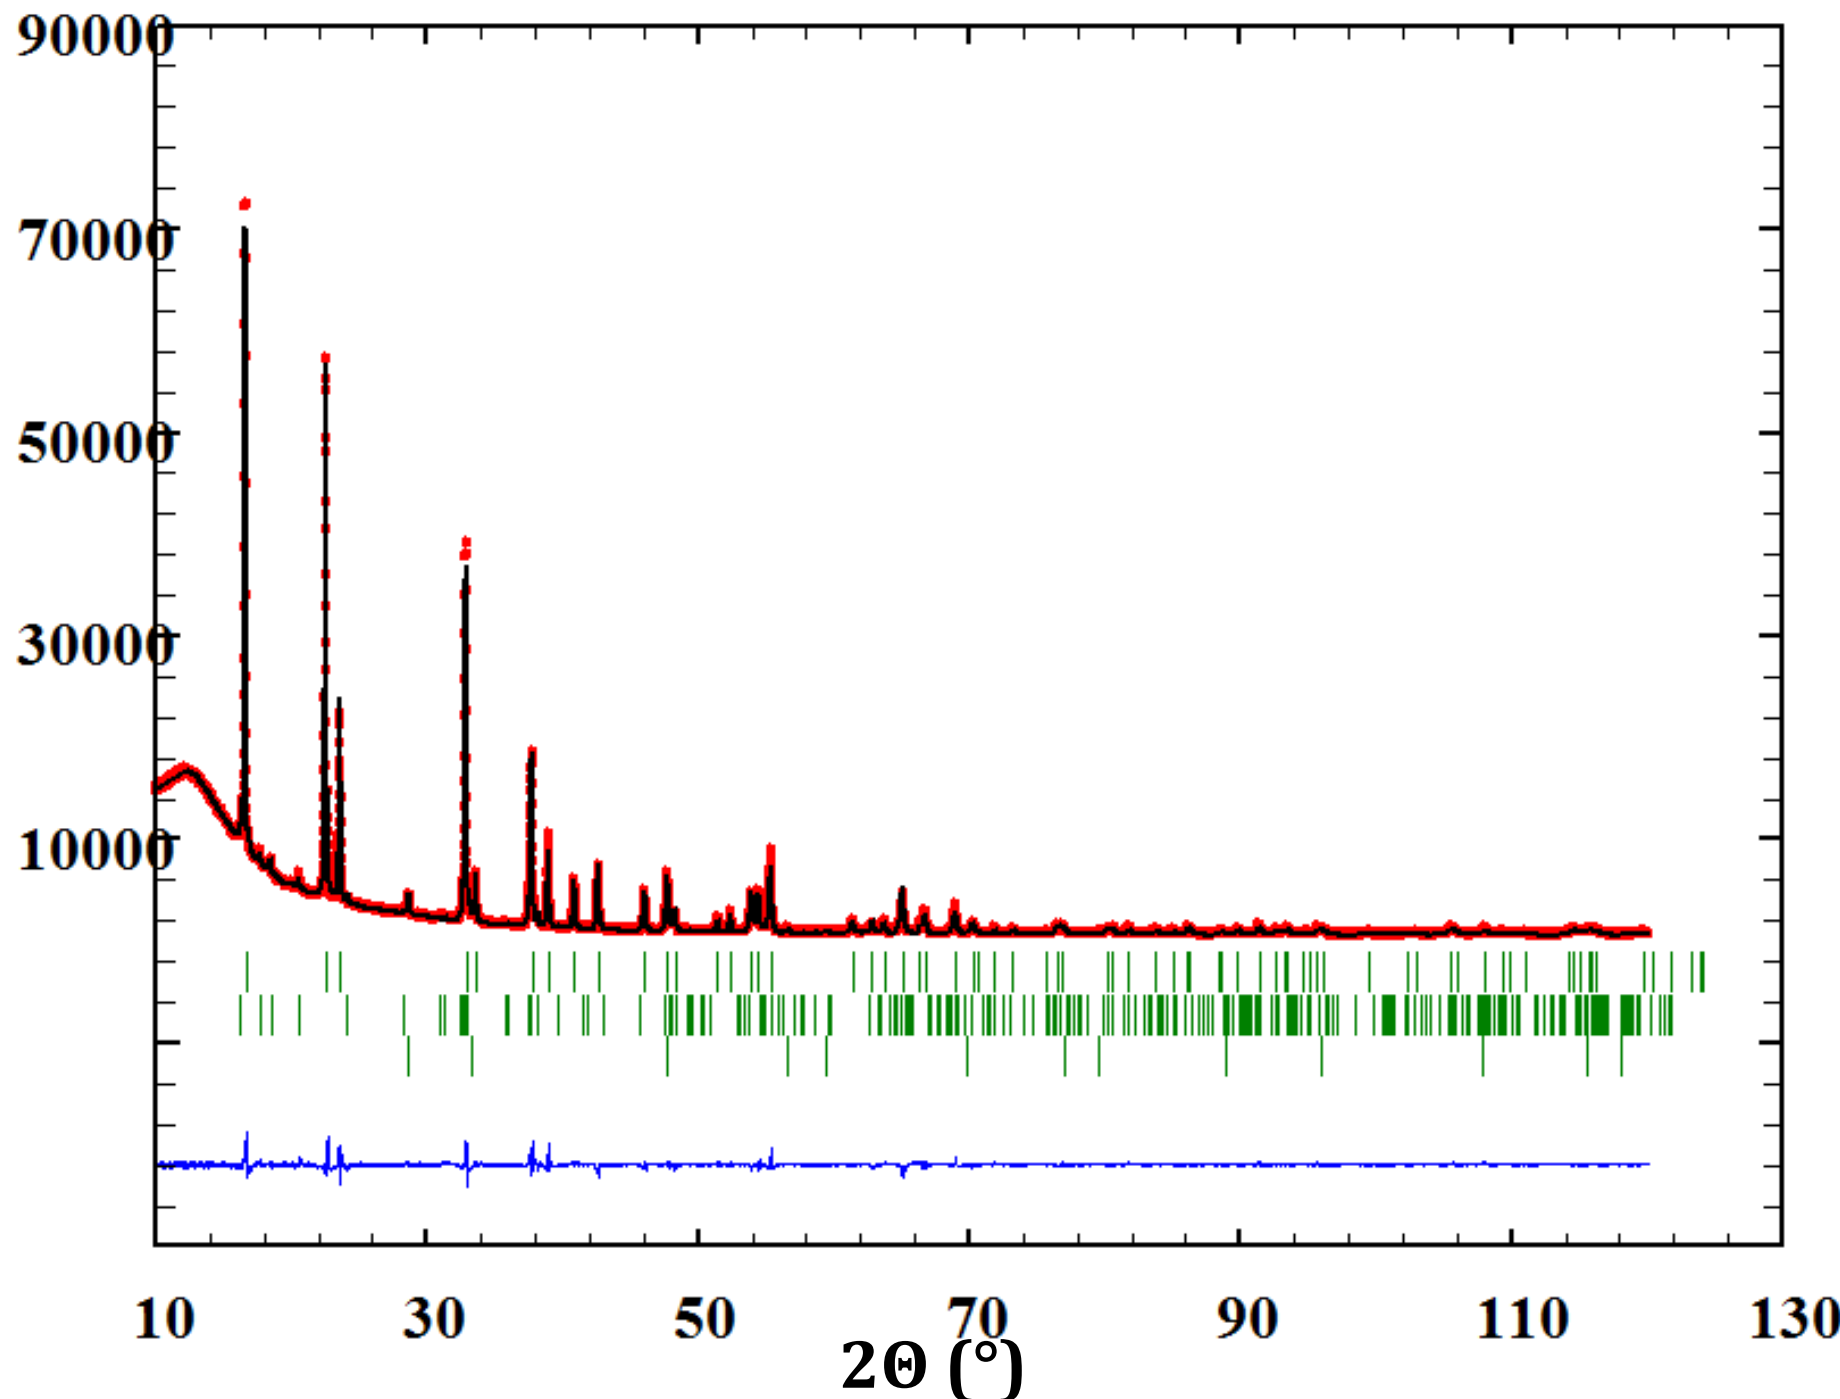

Supplement: Supplementary file 1 [file 3708193]

$\partial^2 A / \partial E^2$

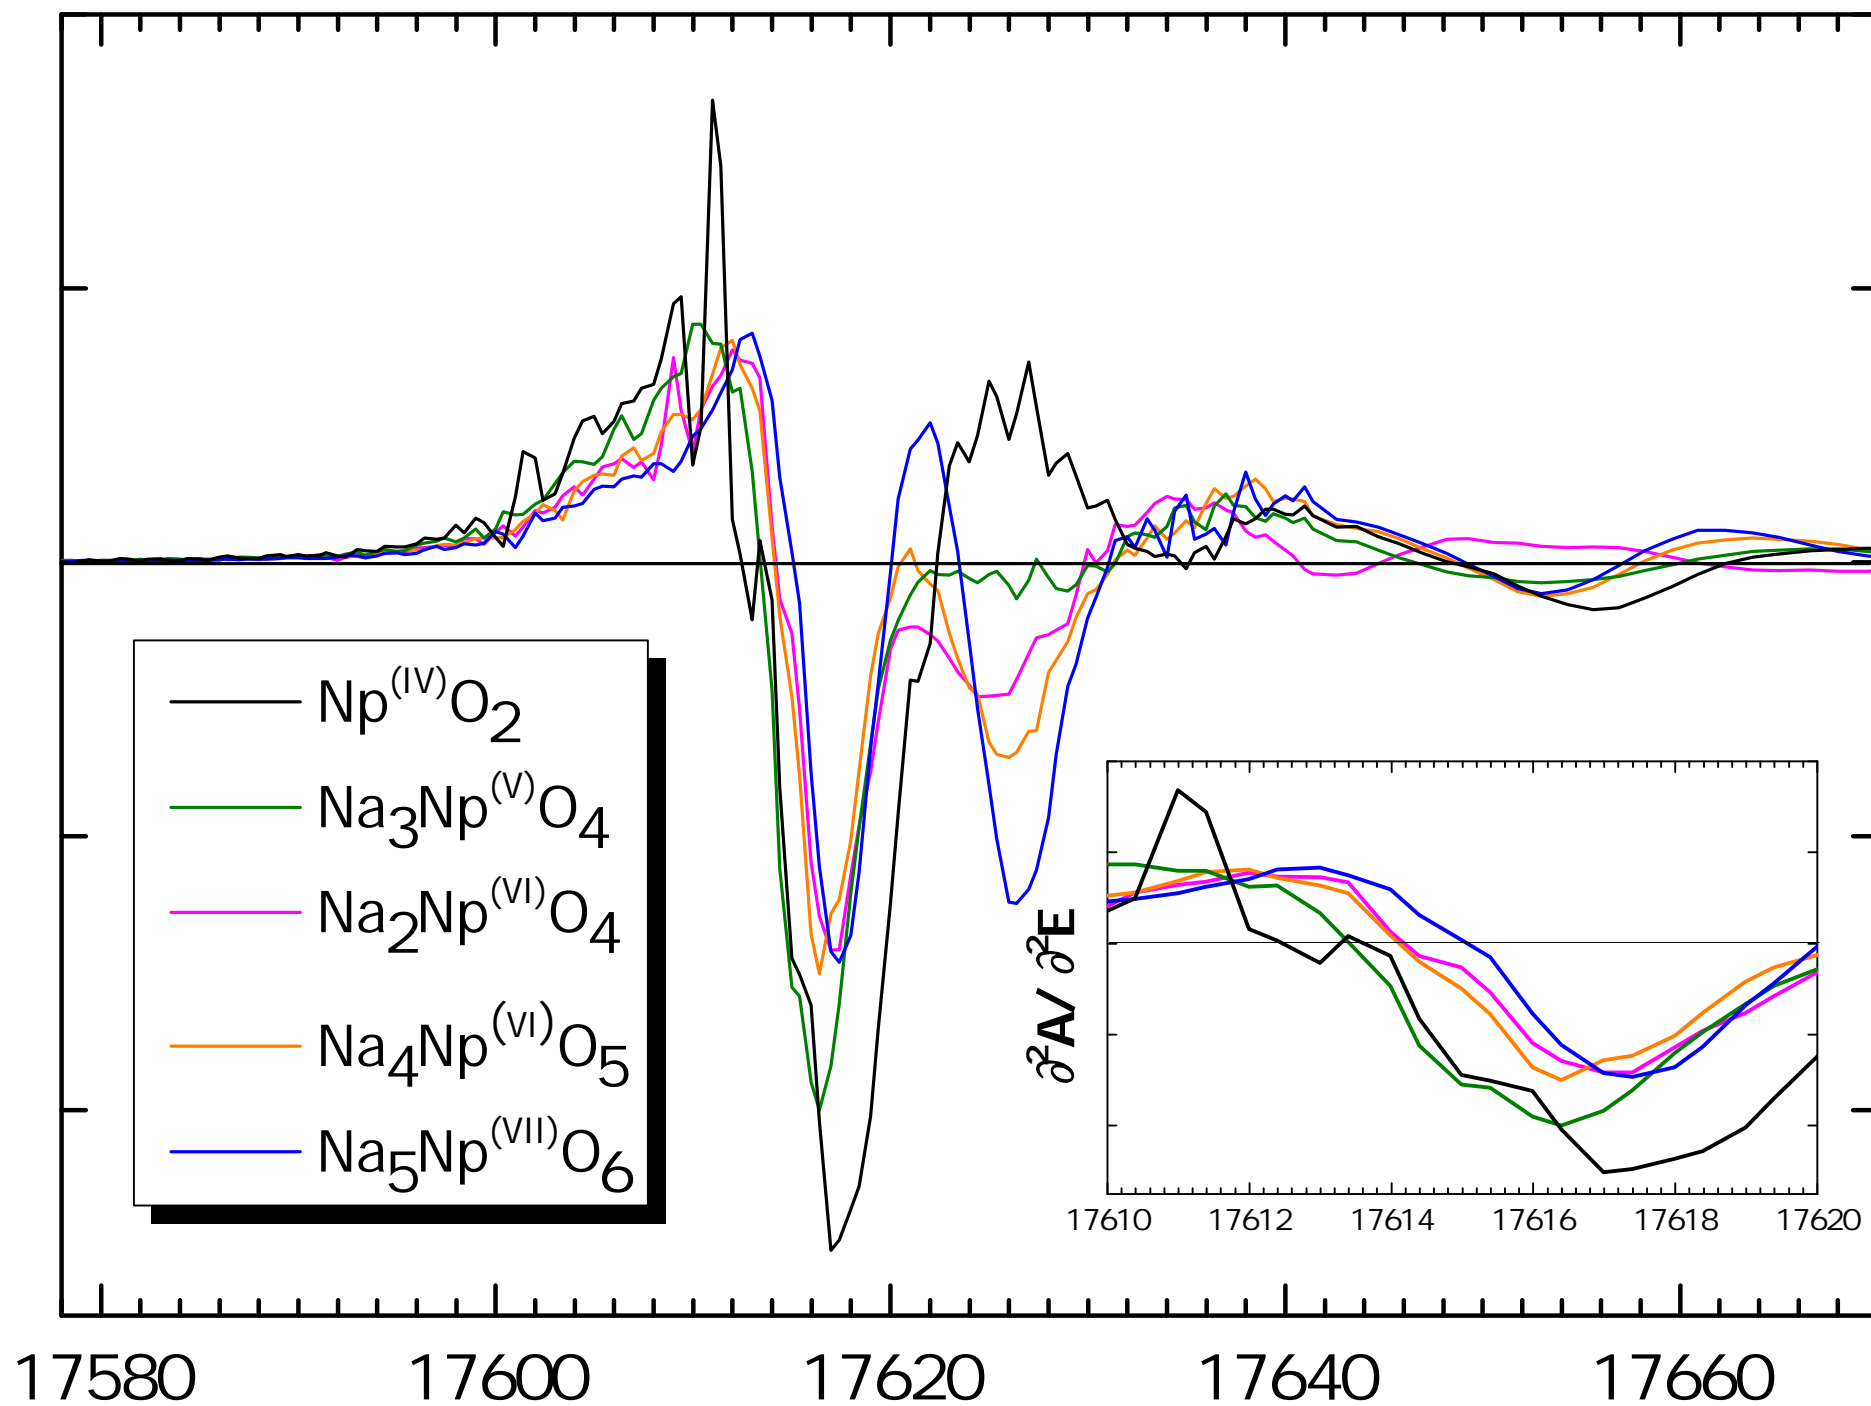

Supplement: Supplementary file 2 [file 3708193]

Intensity (arbitrary units)

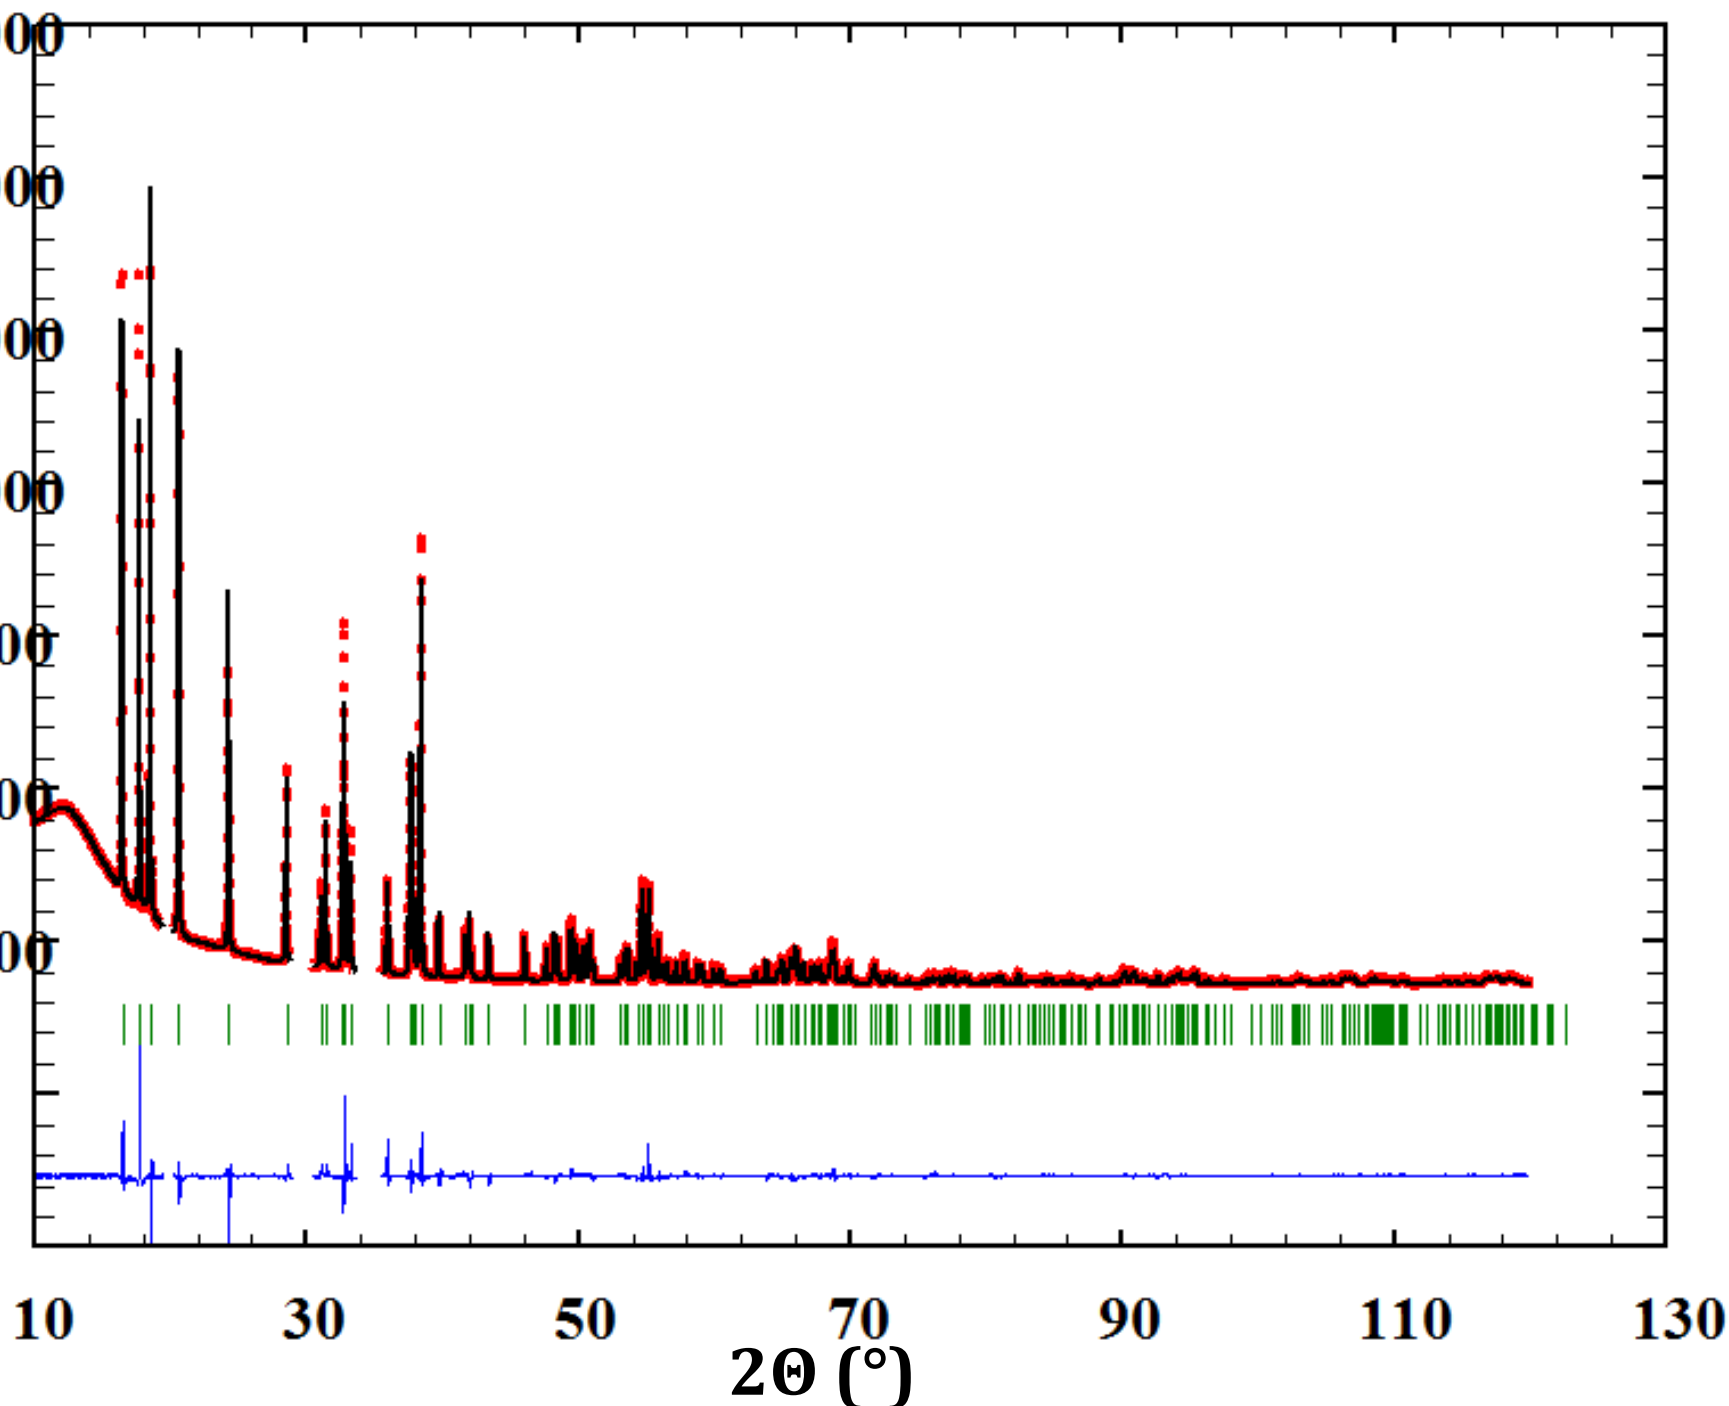

Supplement: Supplementary file 3 [file 3708193]

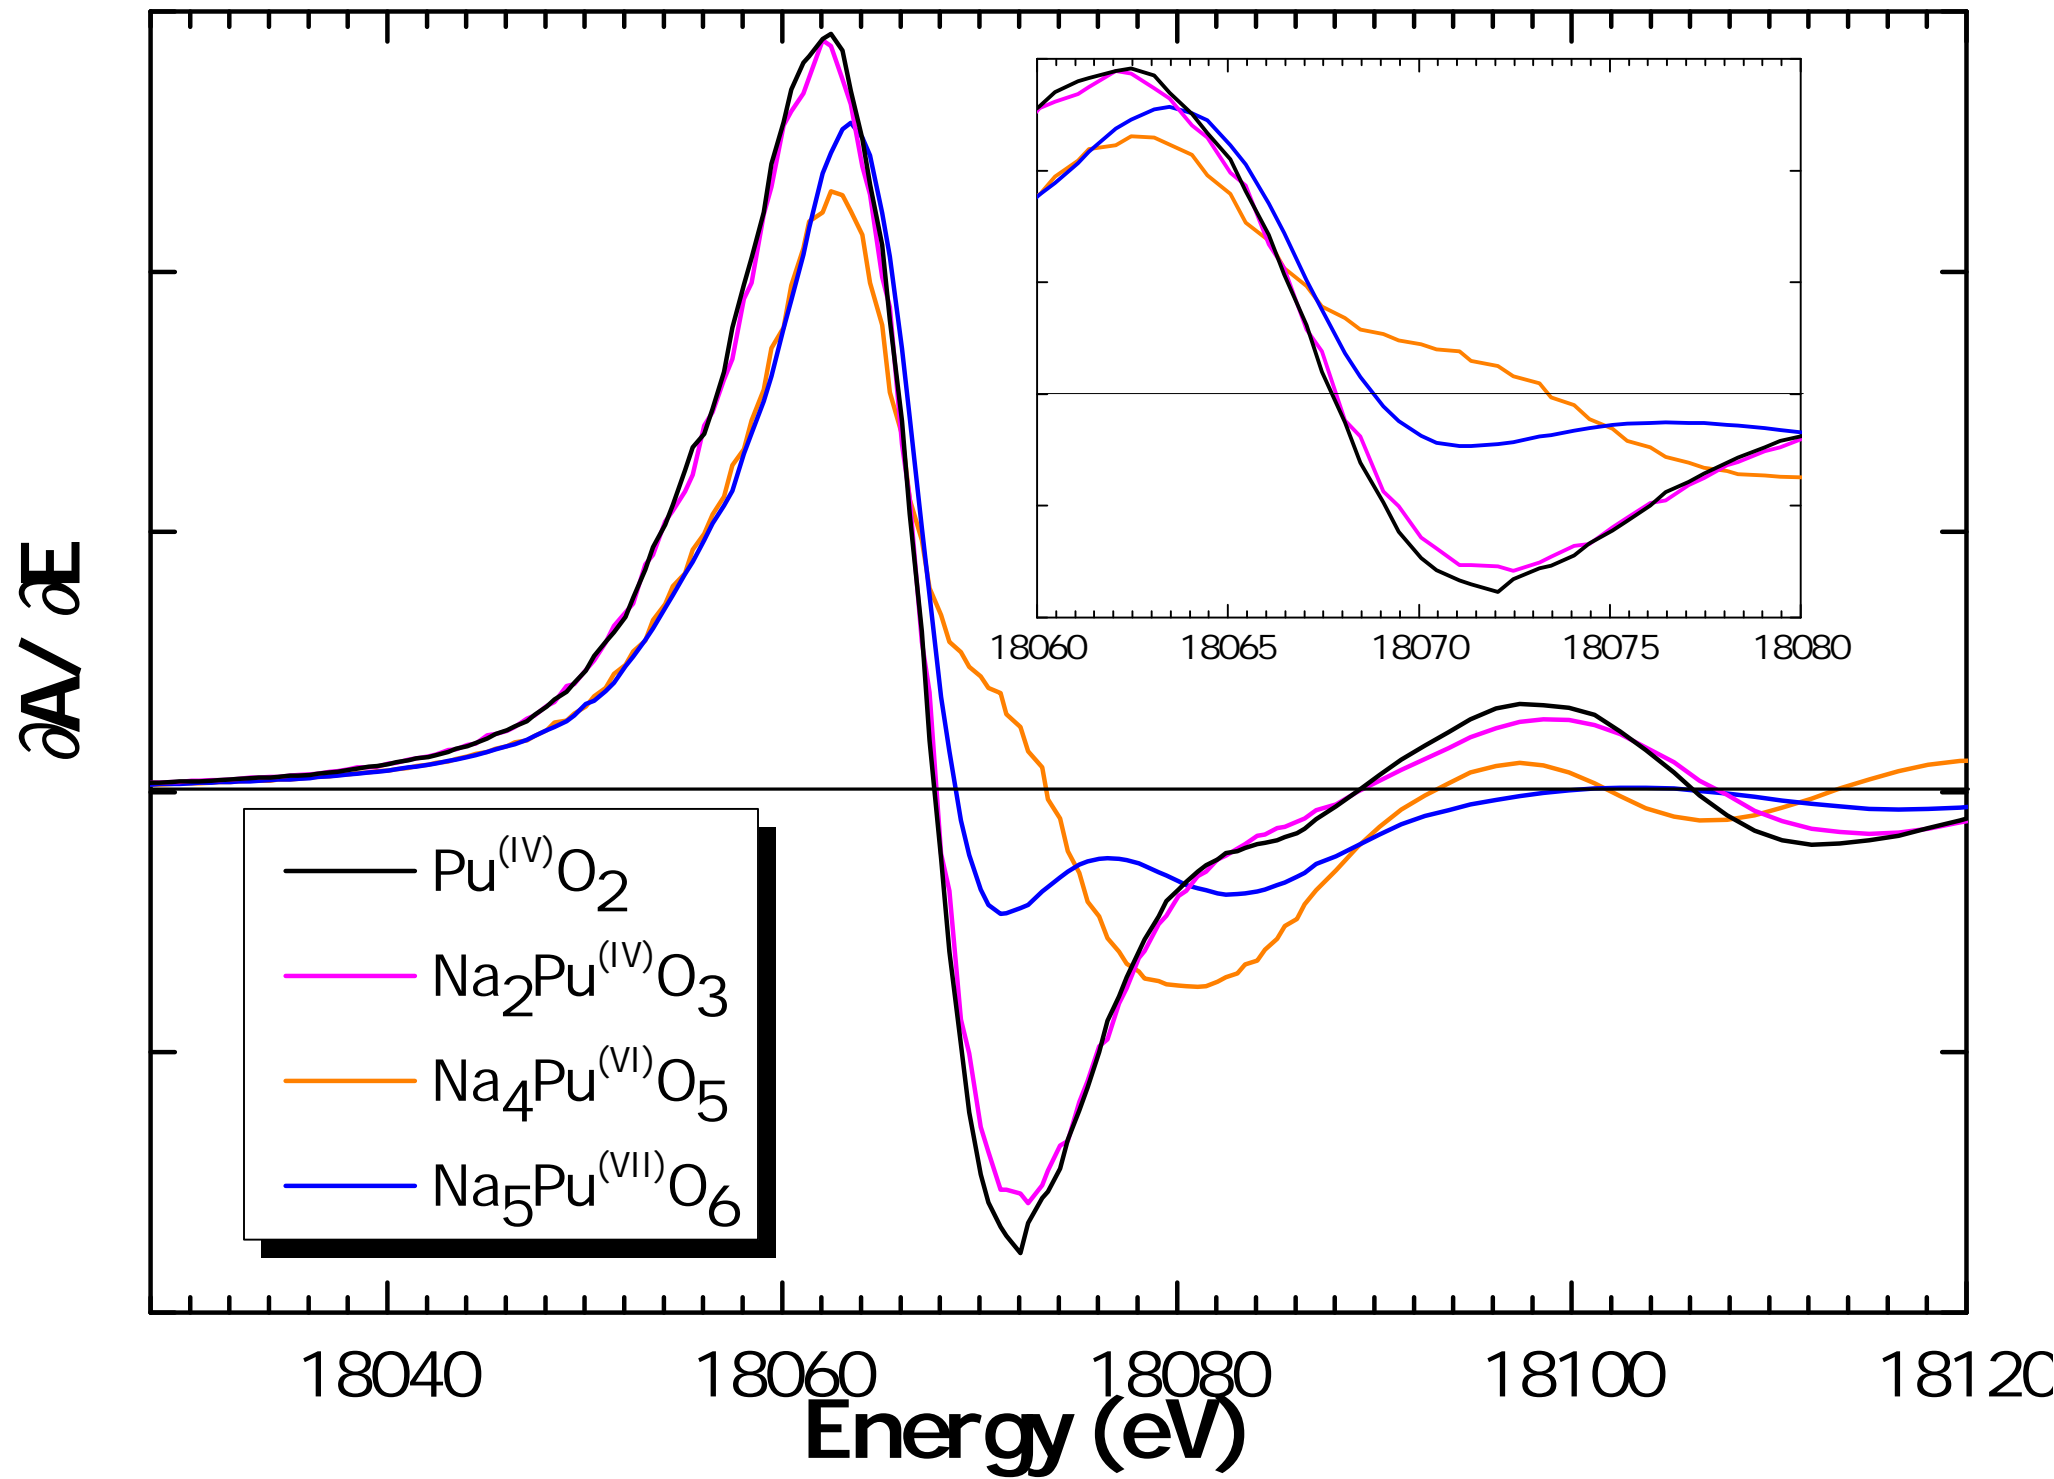

Supplement: Supplementary file 4 [file 3708193]

Intensity (arbitrary units)

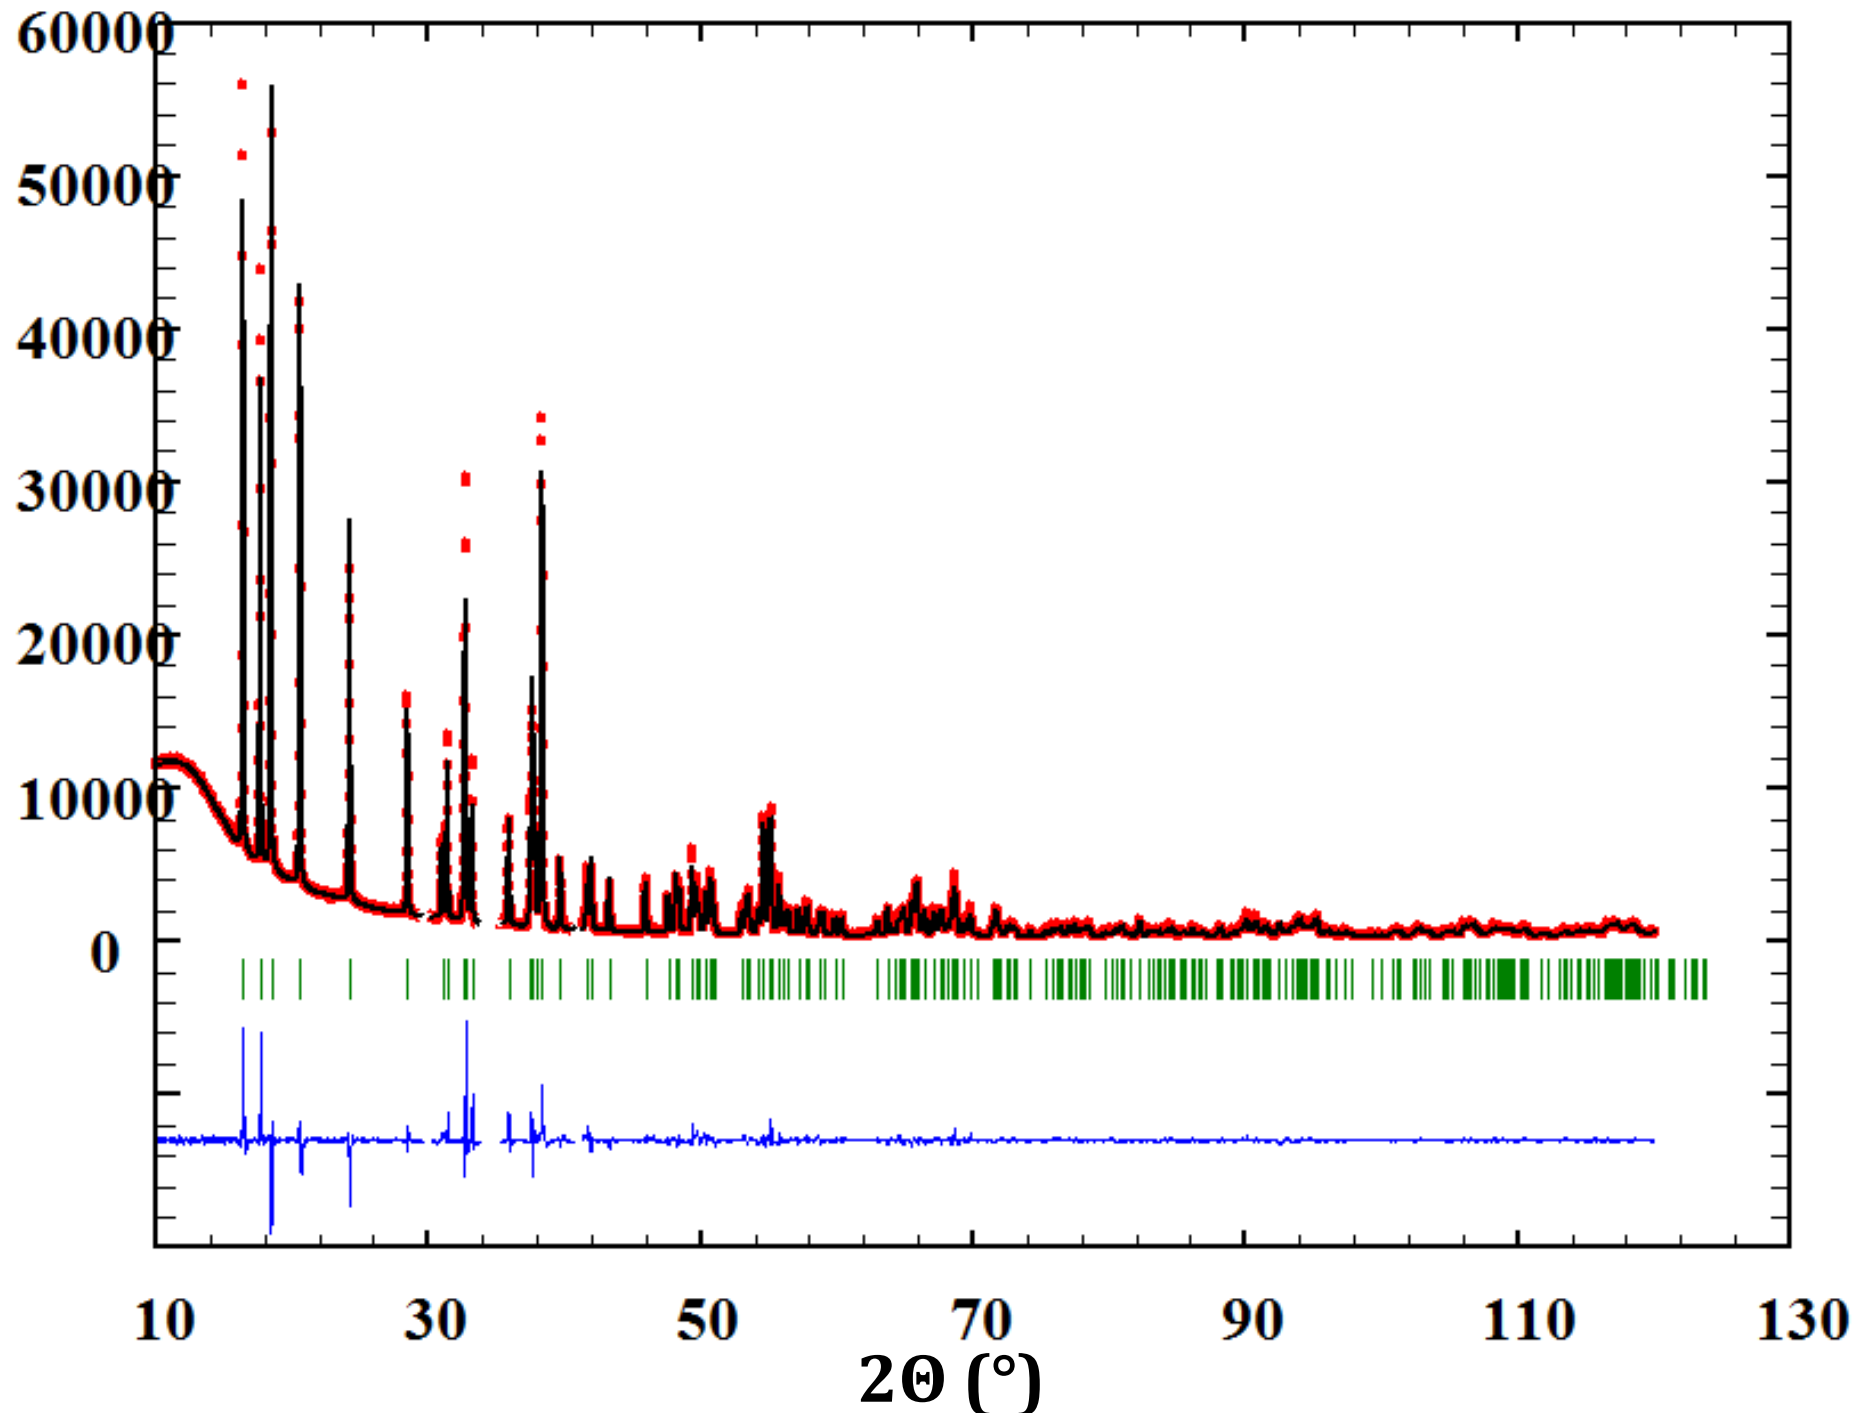

Supplement: Supplementary file 5 [file 3708193]

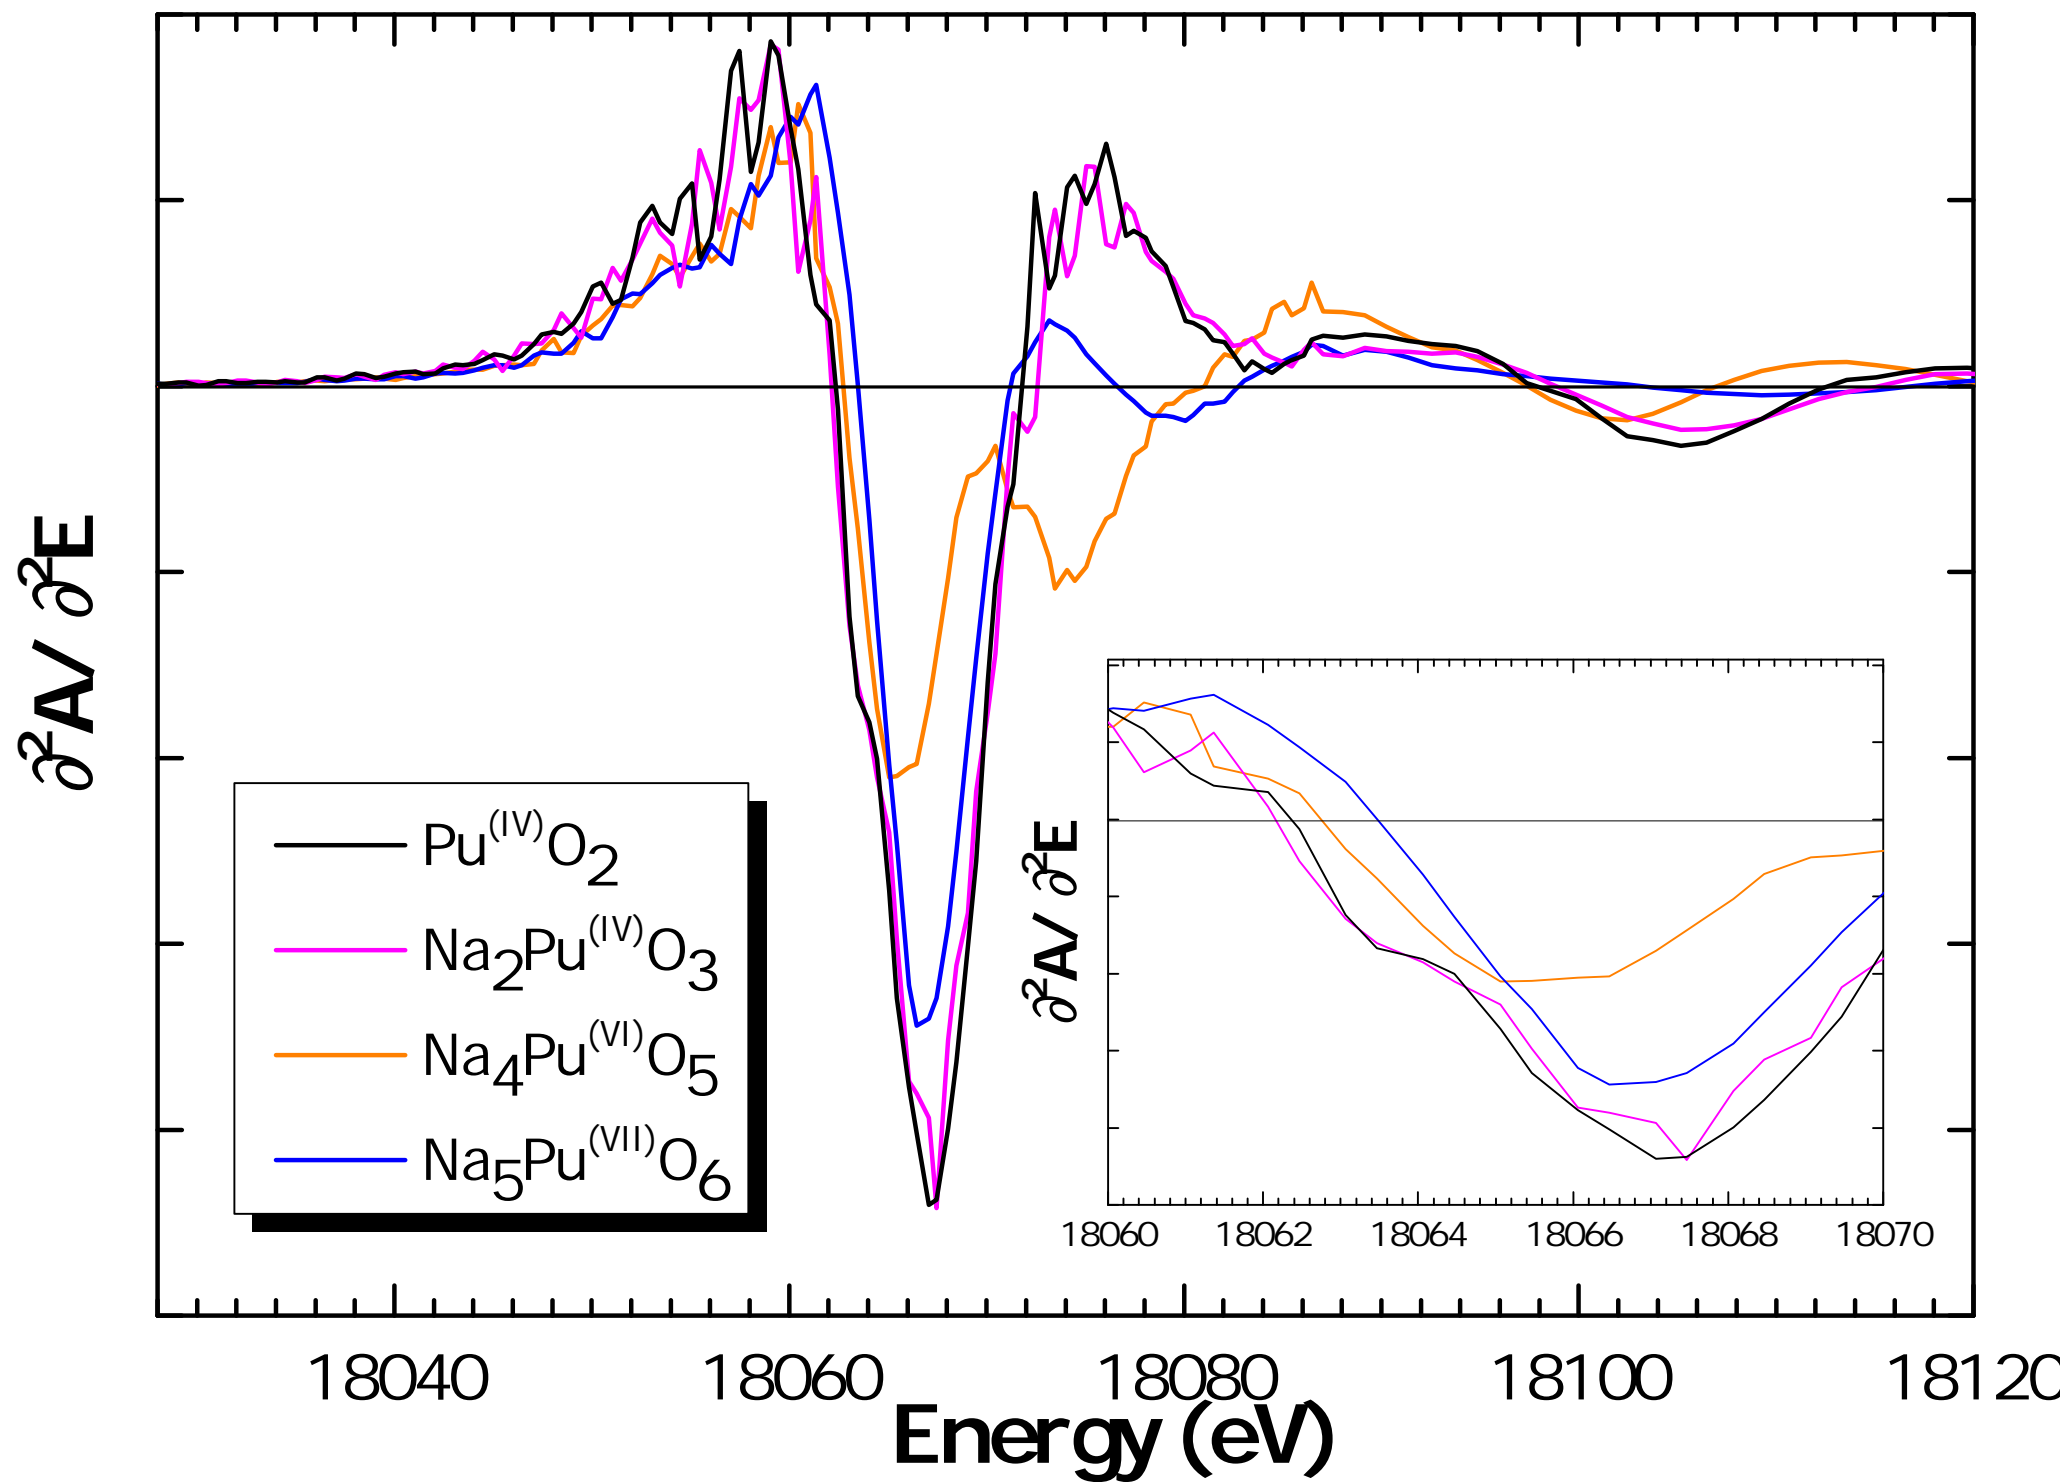

Supplement: Supplementary file 6 [file 3708193]

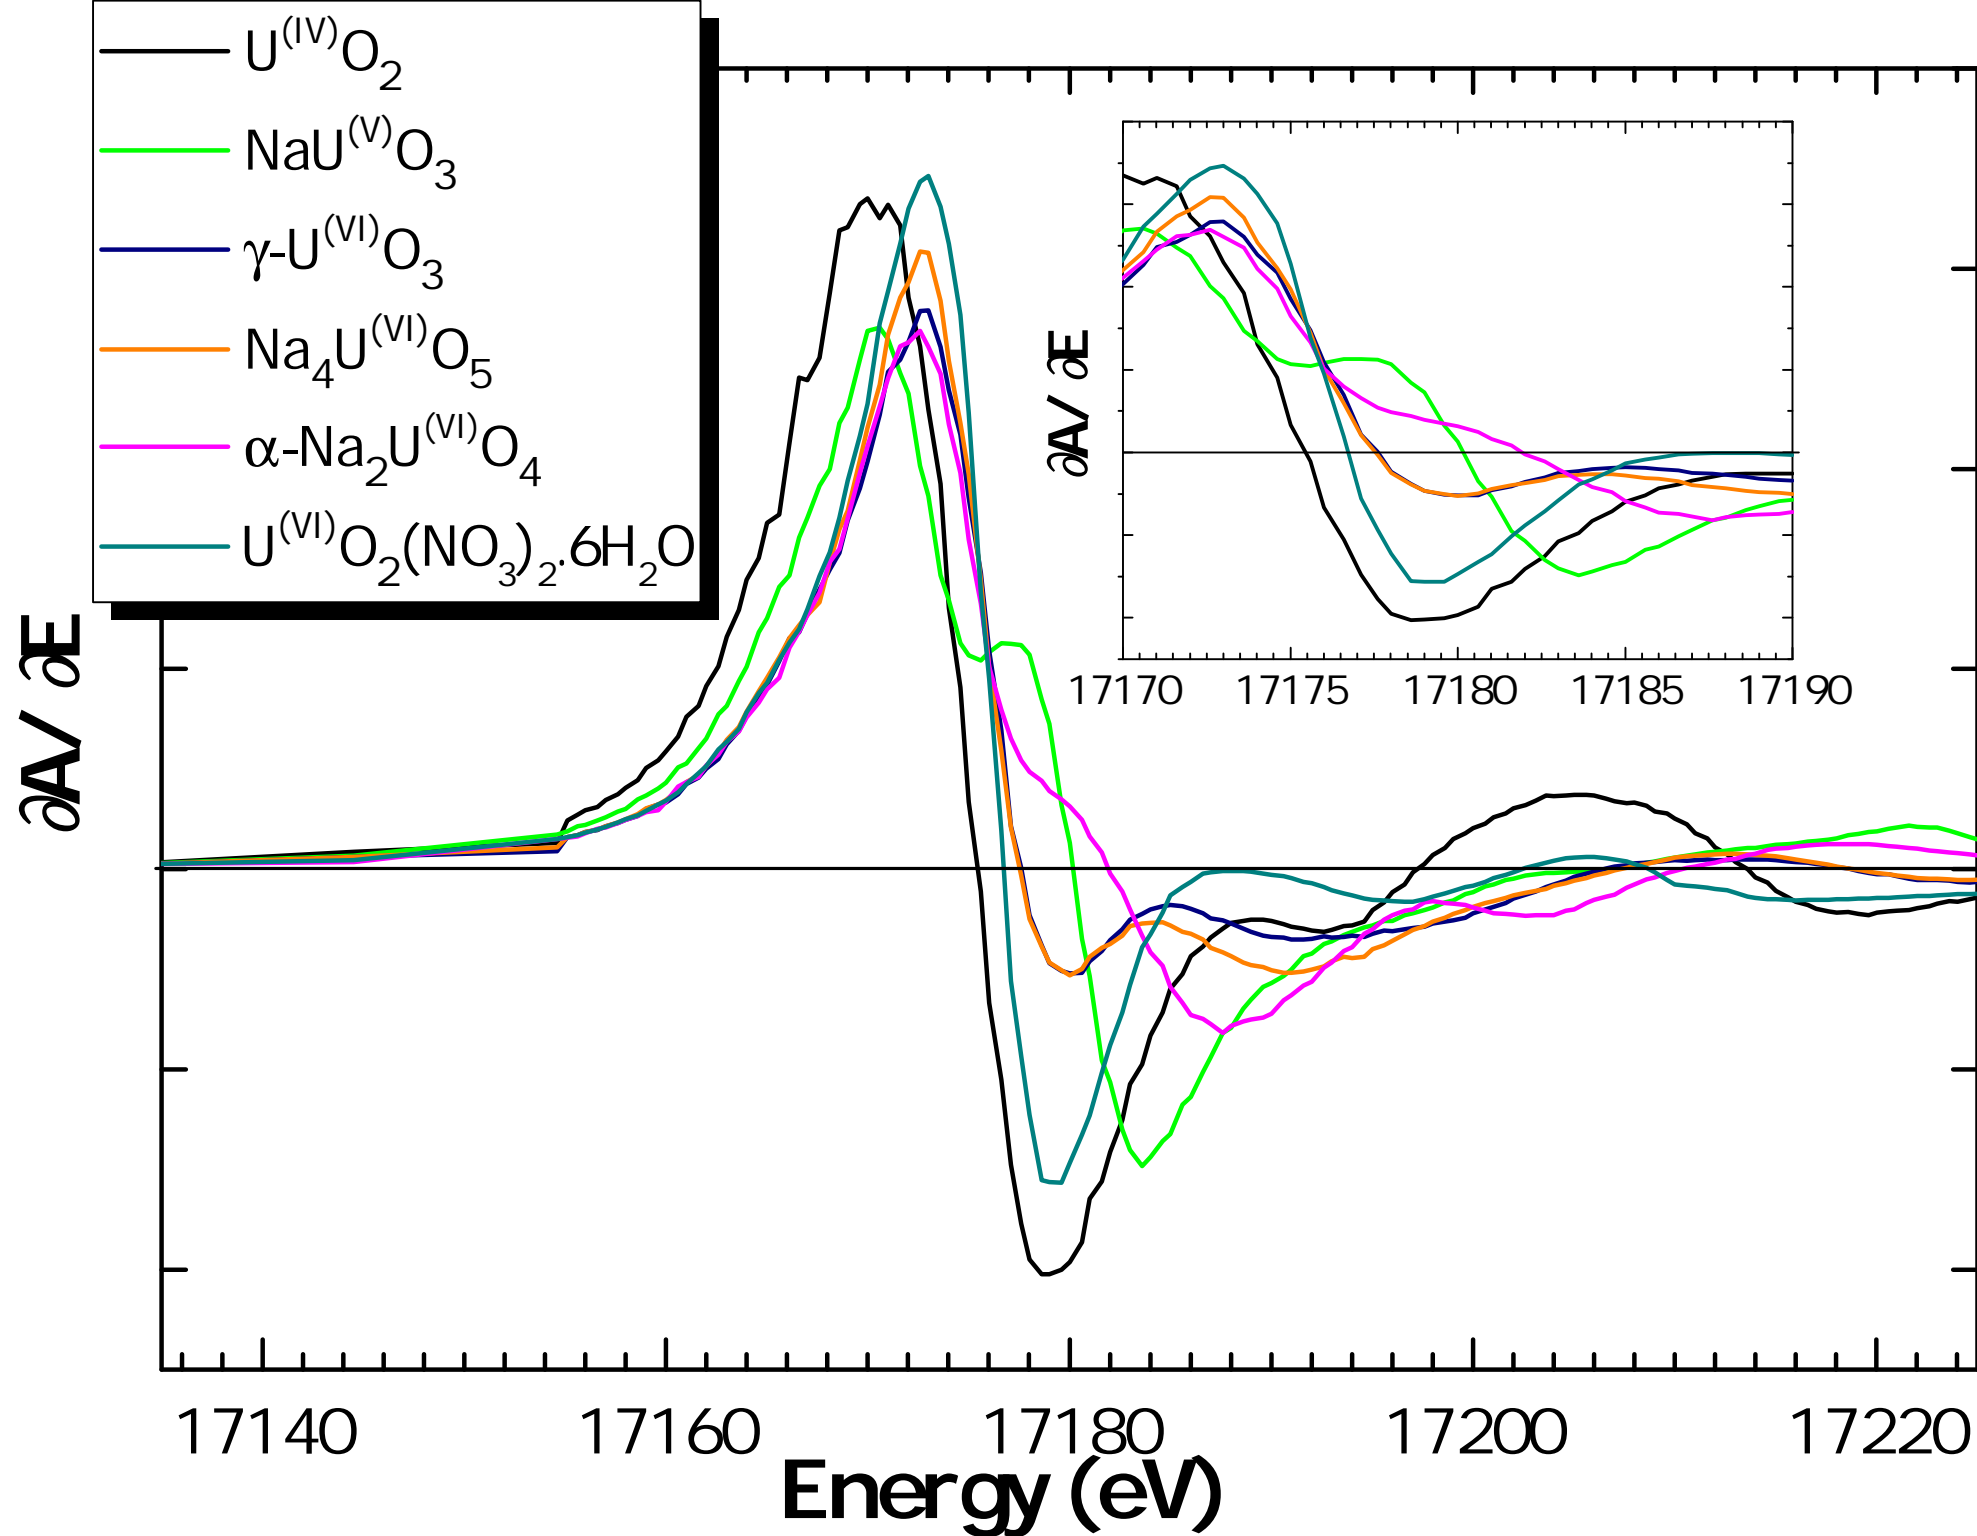

Supplement: Supplementary file 7 [file 3708193]

Intensity (arbitrary units)

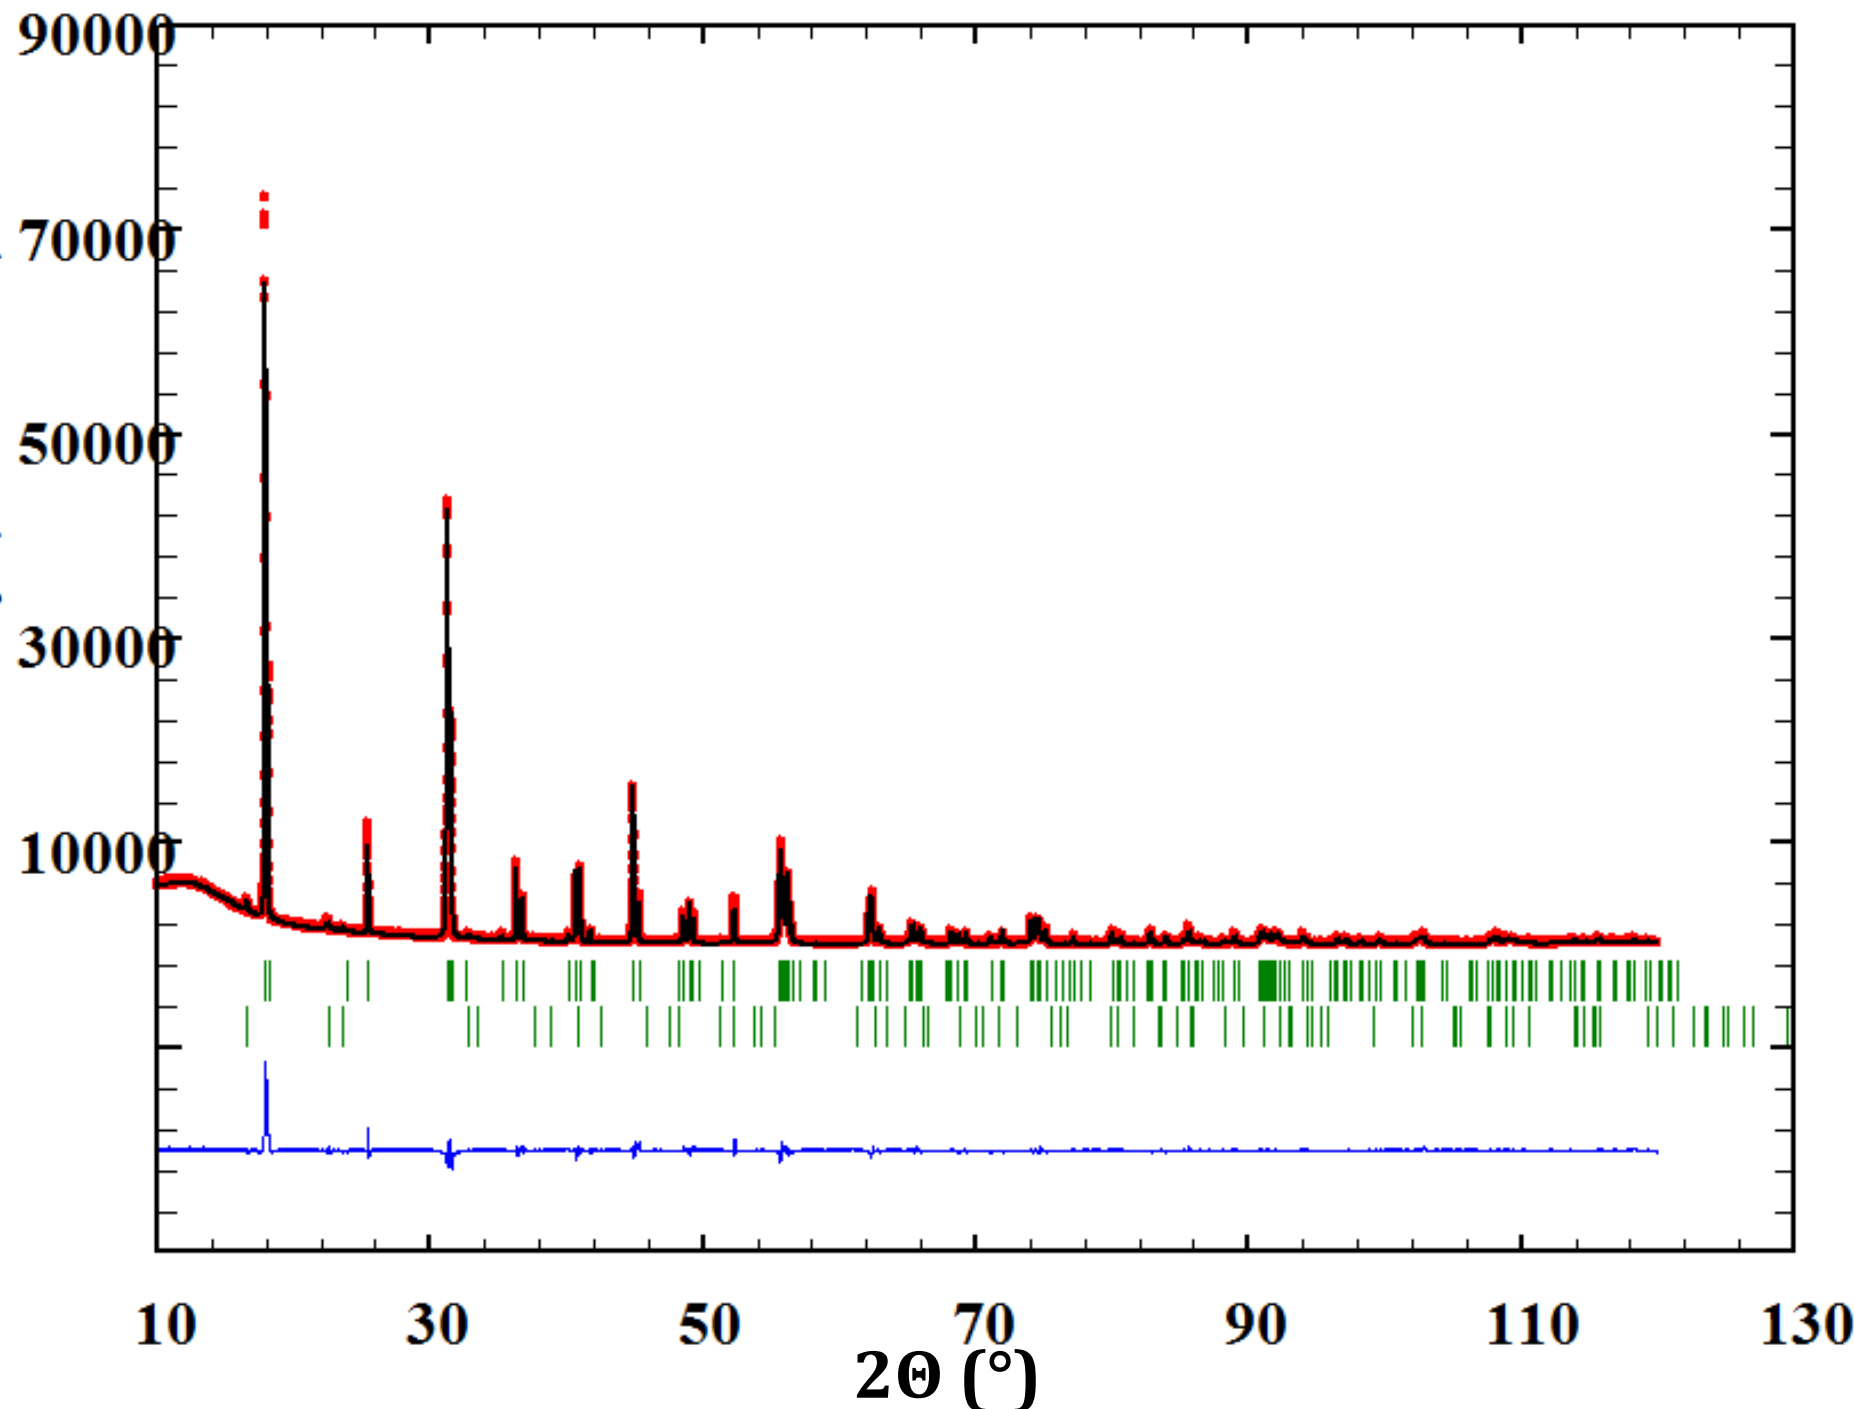

Supplement: Supplementary file 8 [file 3708193]

Intensity (arbitrary units)

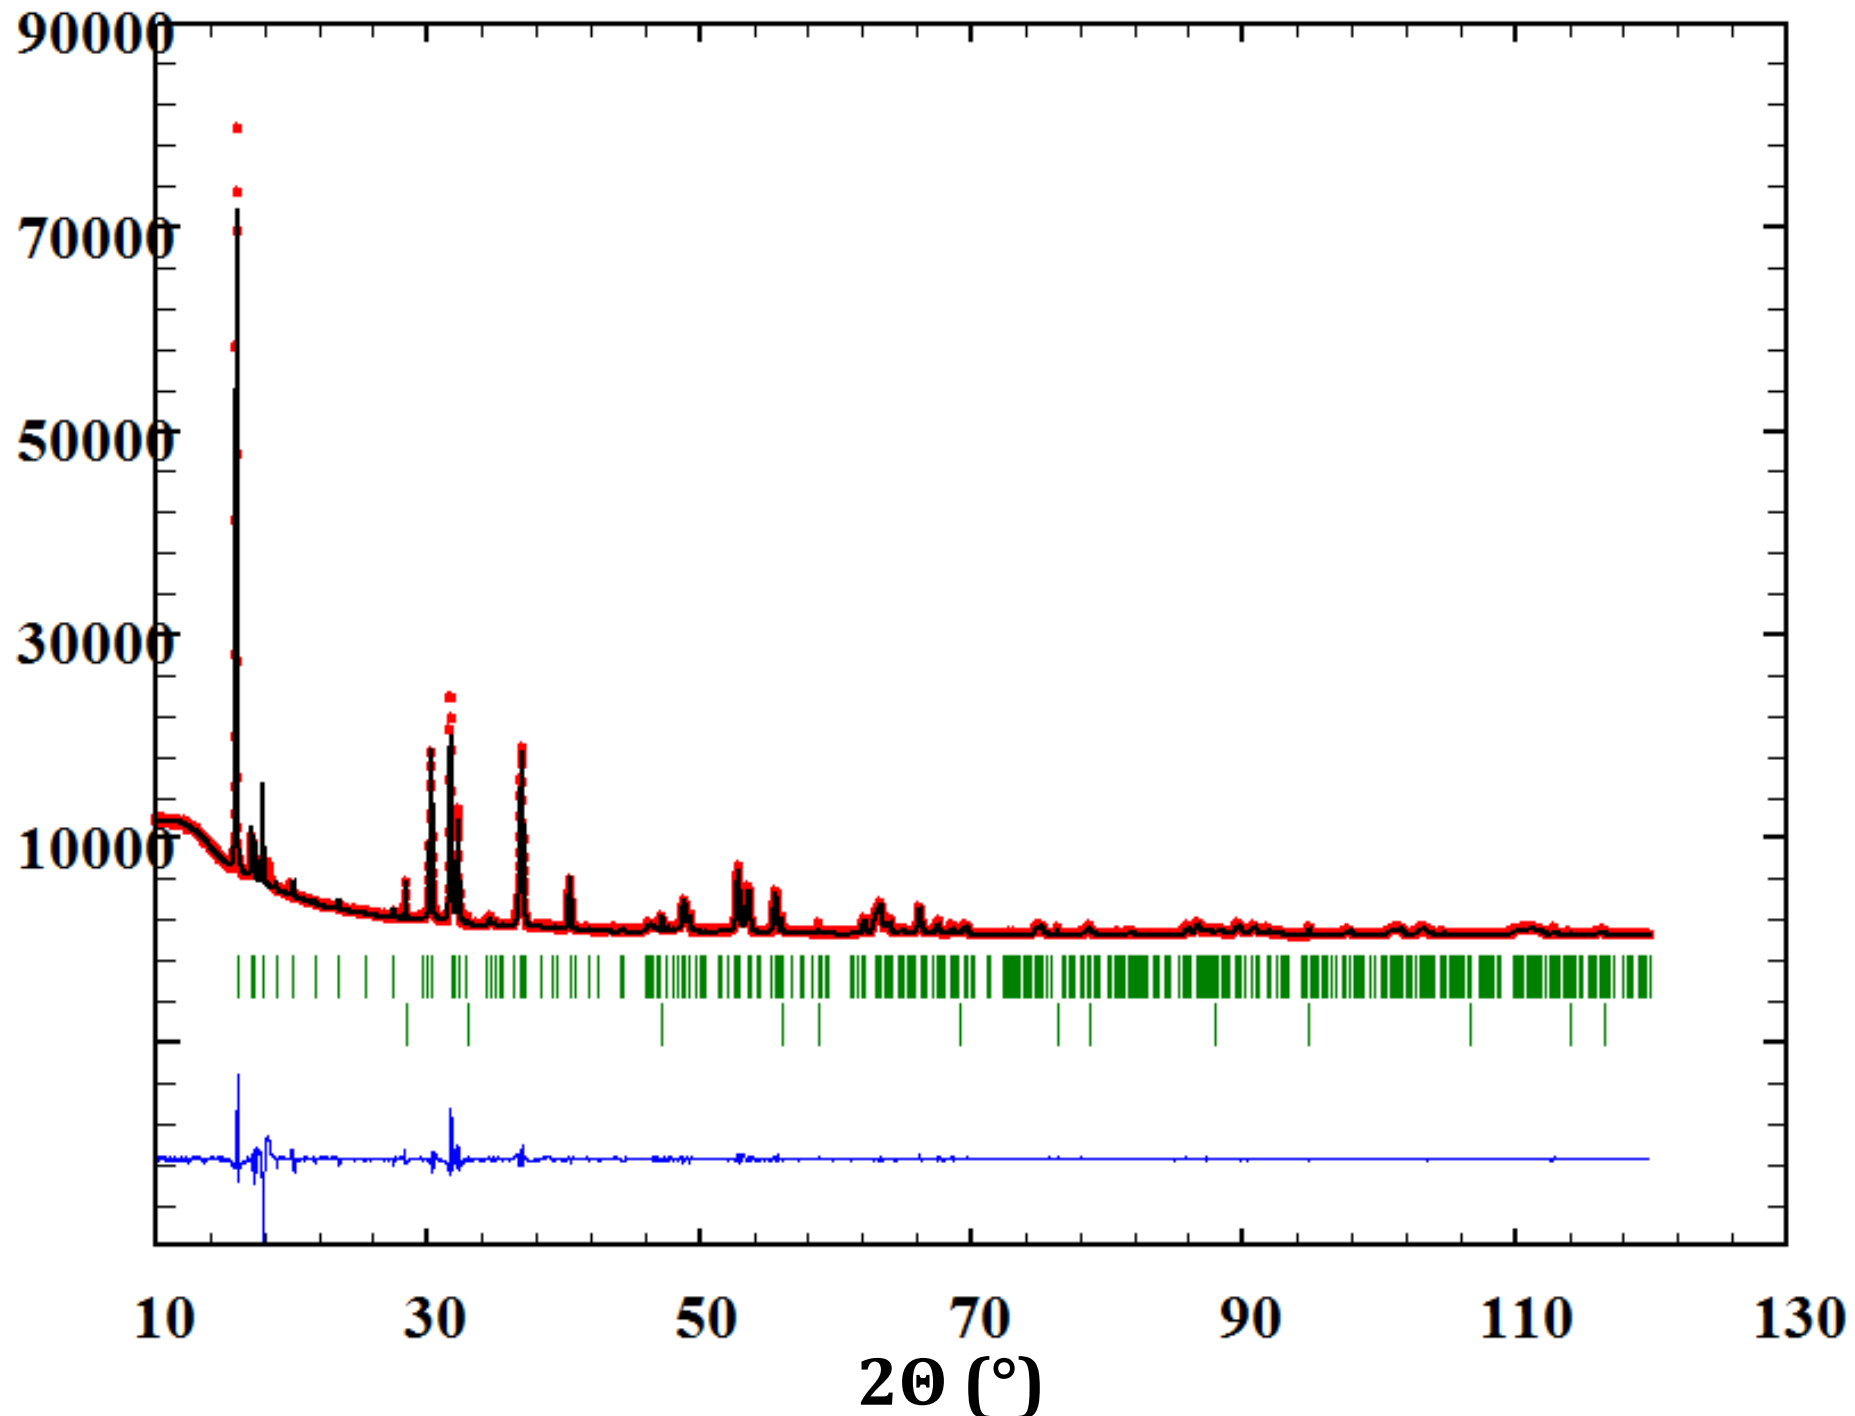

Supplement: Supplementary file 9 [file 3708193]

Intensity (arbitrary units)

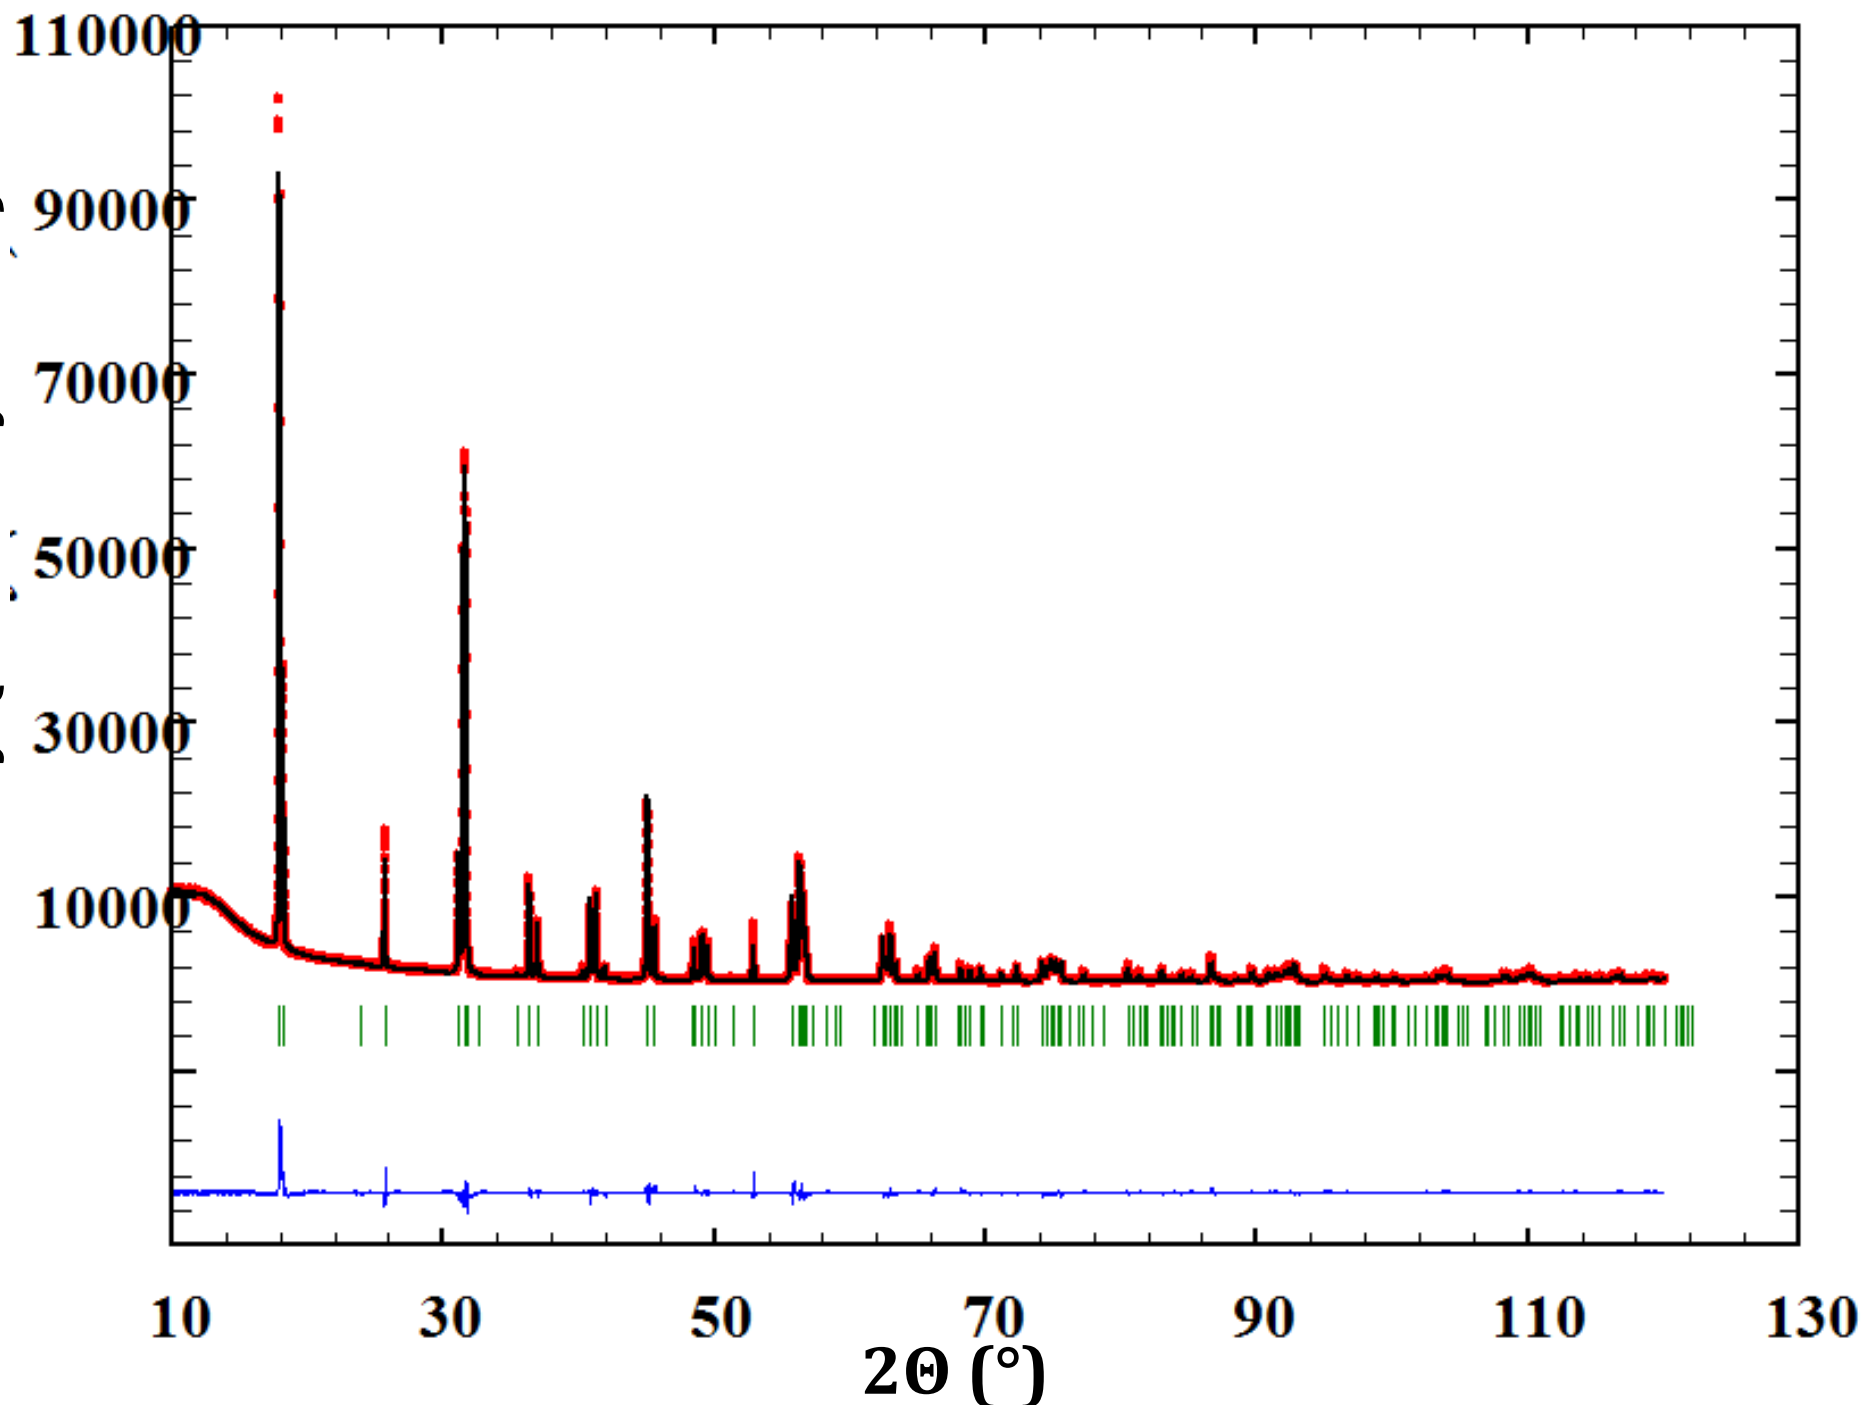

Supplement: Supplementary file 10 [file 3708193]

Intensity (arbitrary units)

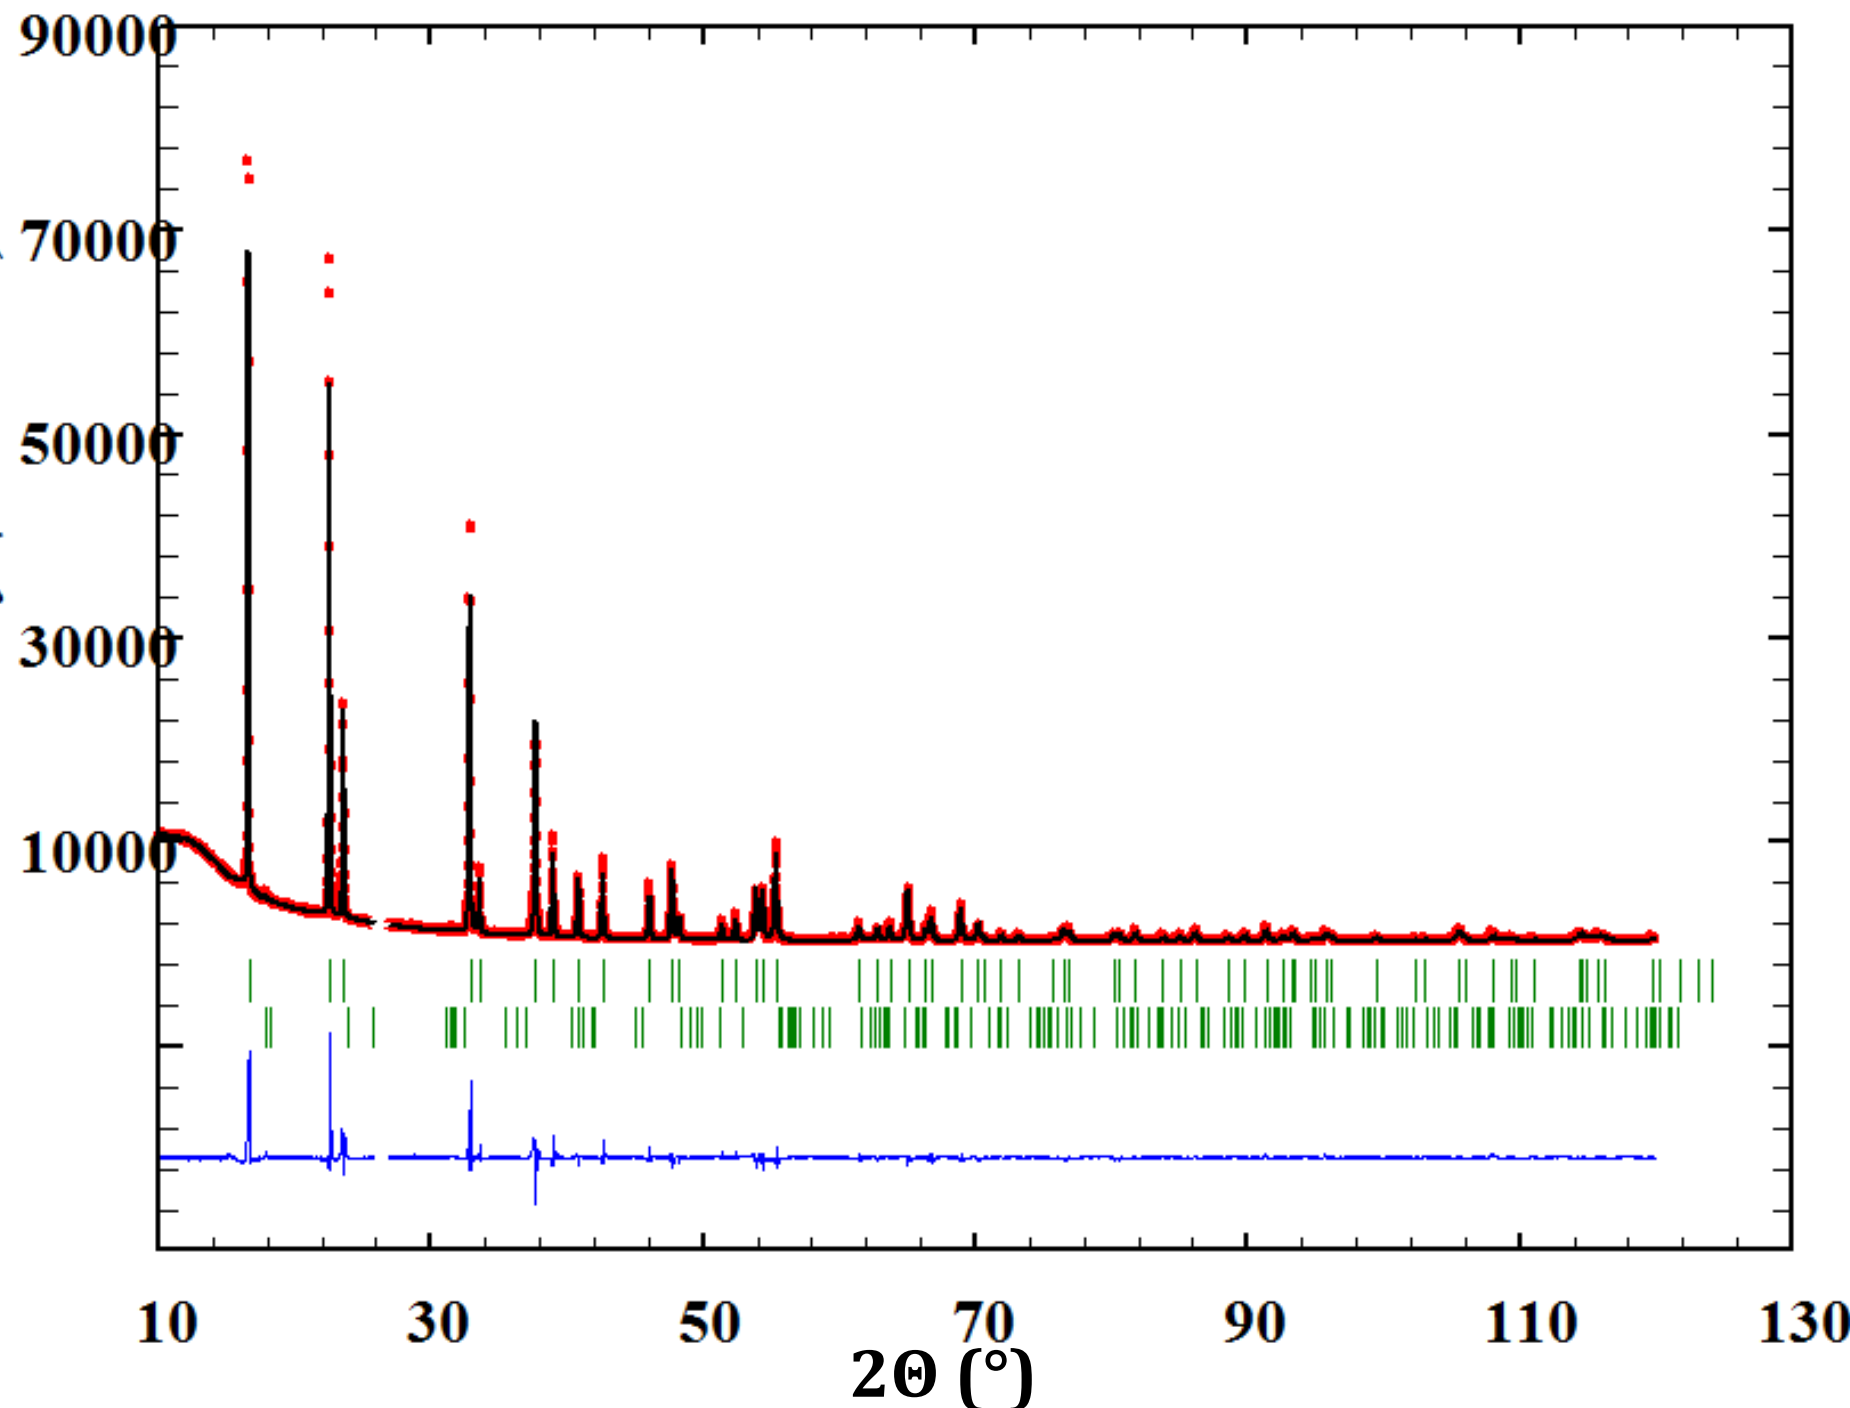

Supplement: Supplementary file 11 [file 3708193]

$\partial^2 A / \partial^2 E$ 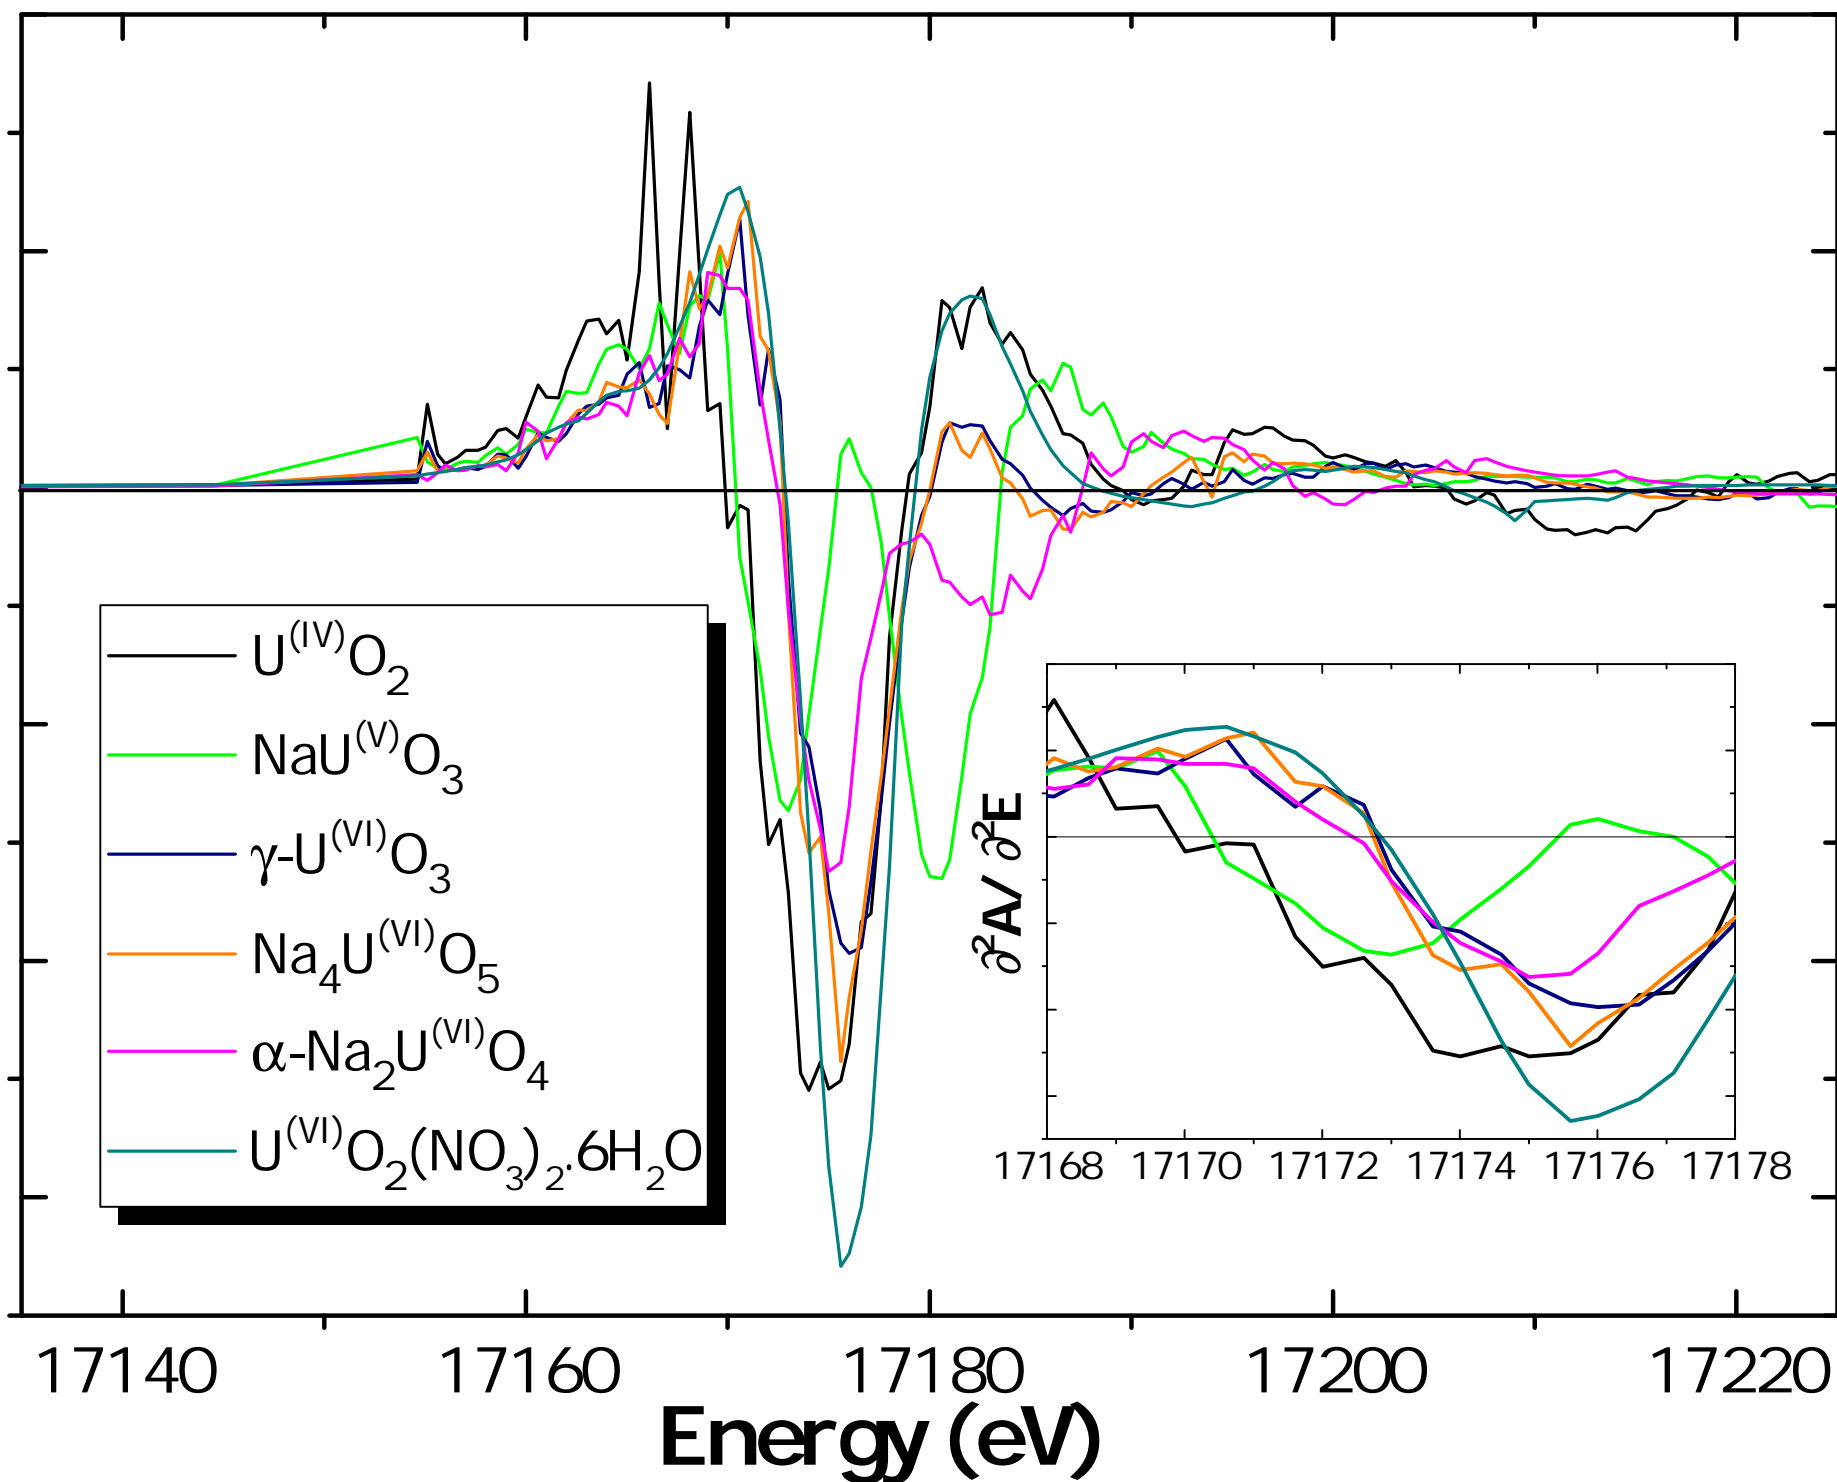

Supplement: Supplementary file 12 [file 3708193]

Intensity (arbitrary units)

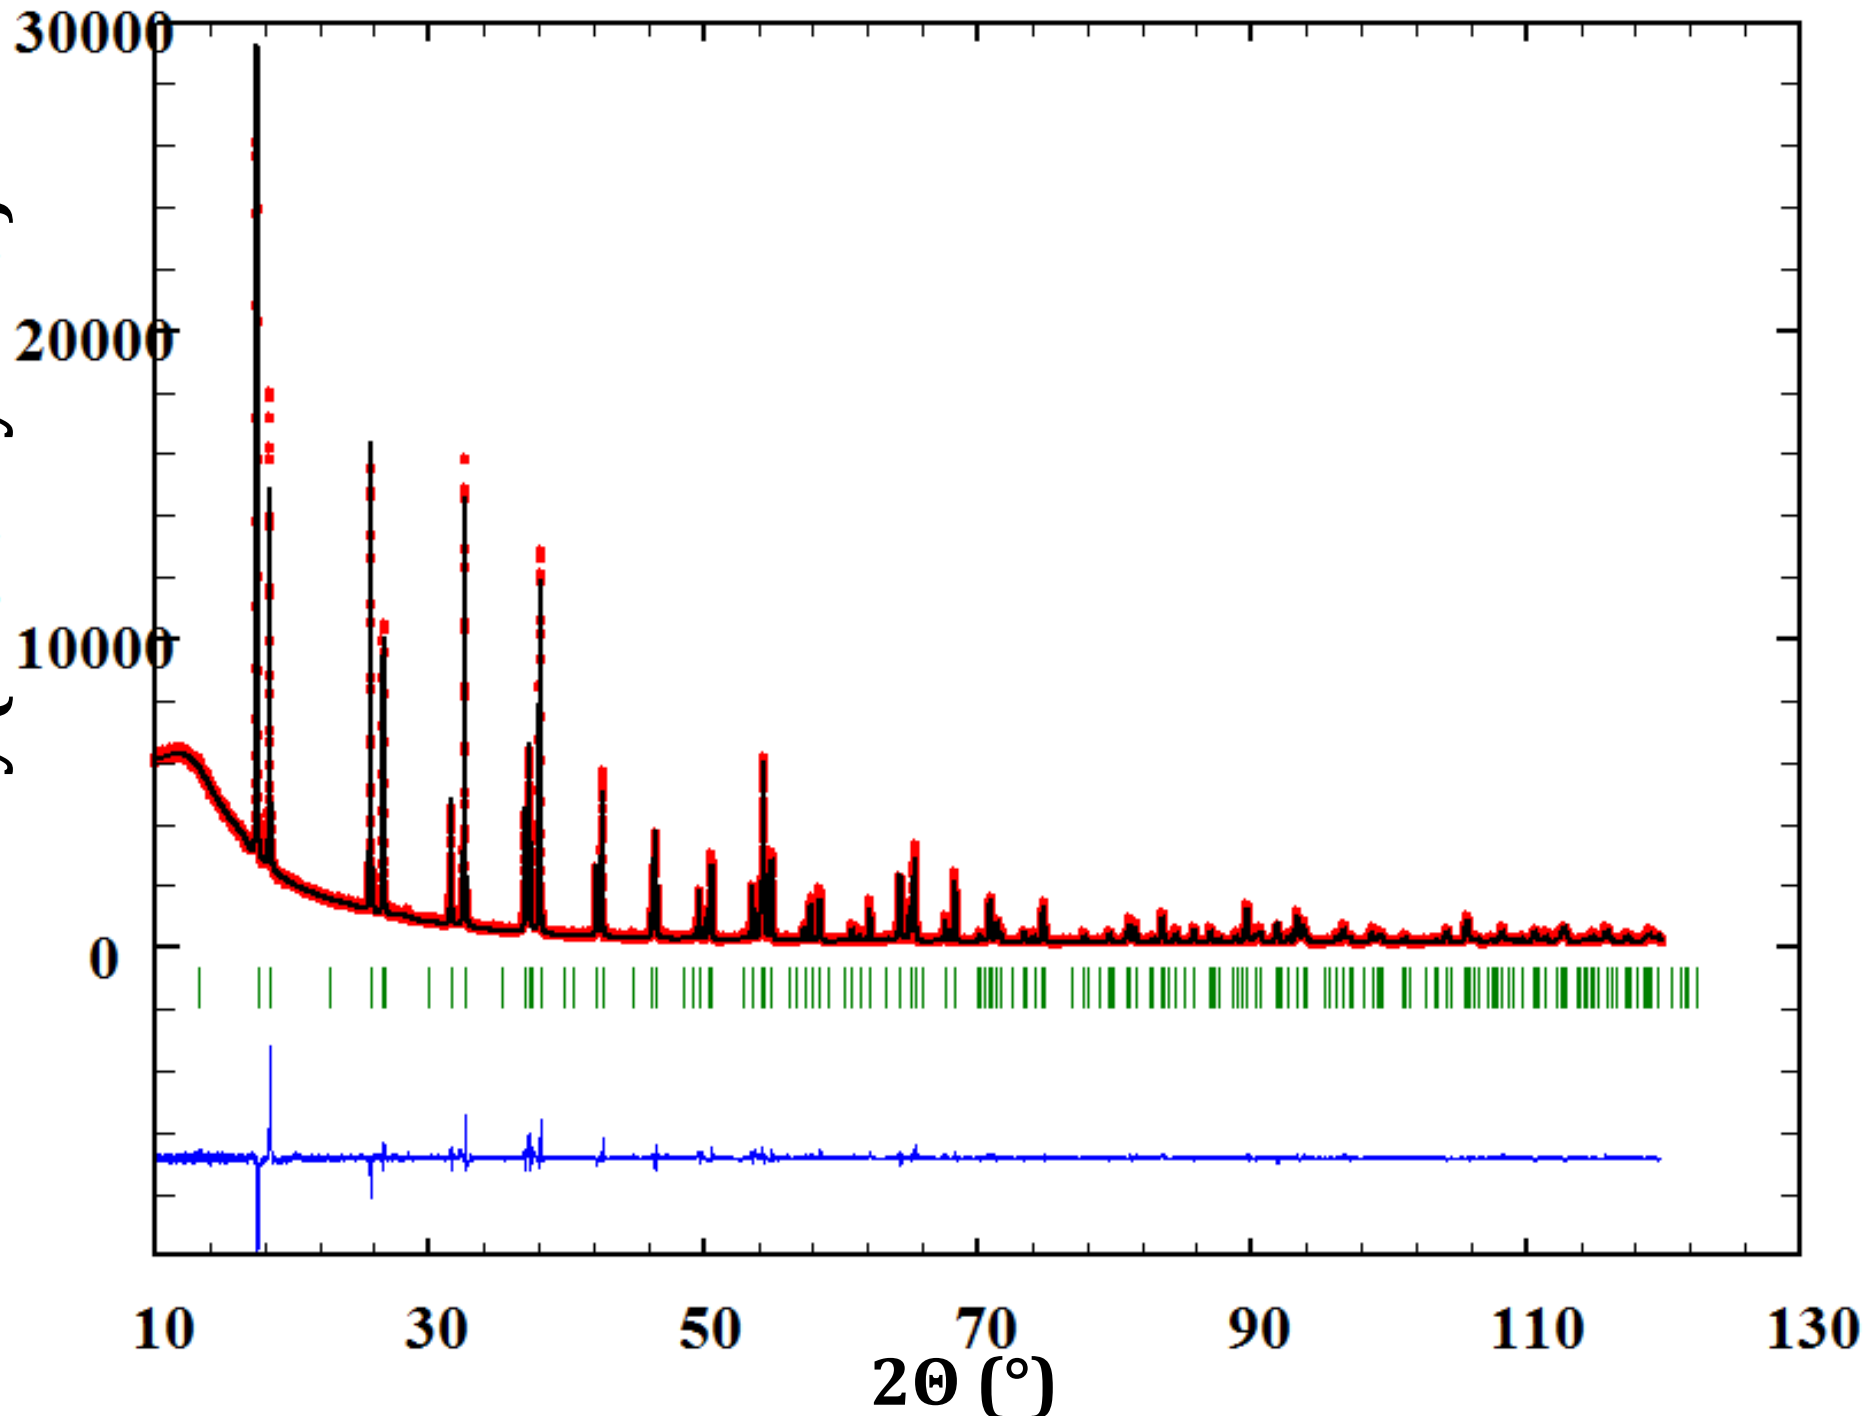

Supplement: Supplementary file 13 [file 3708193]

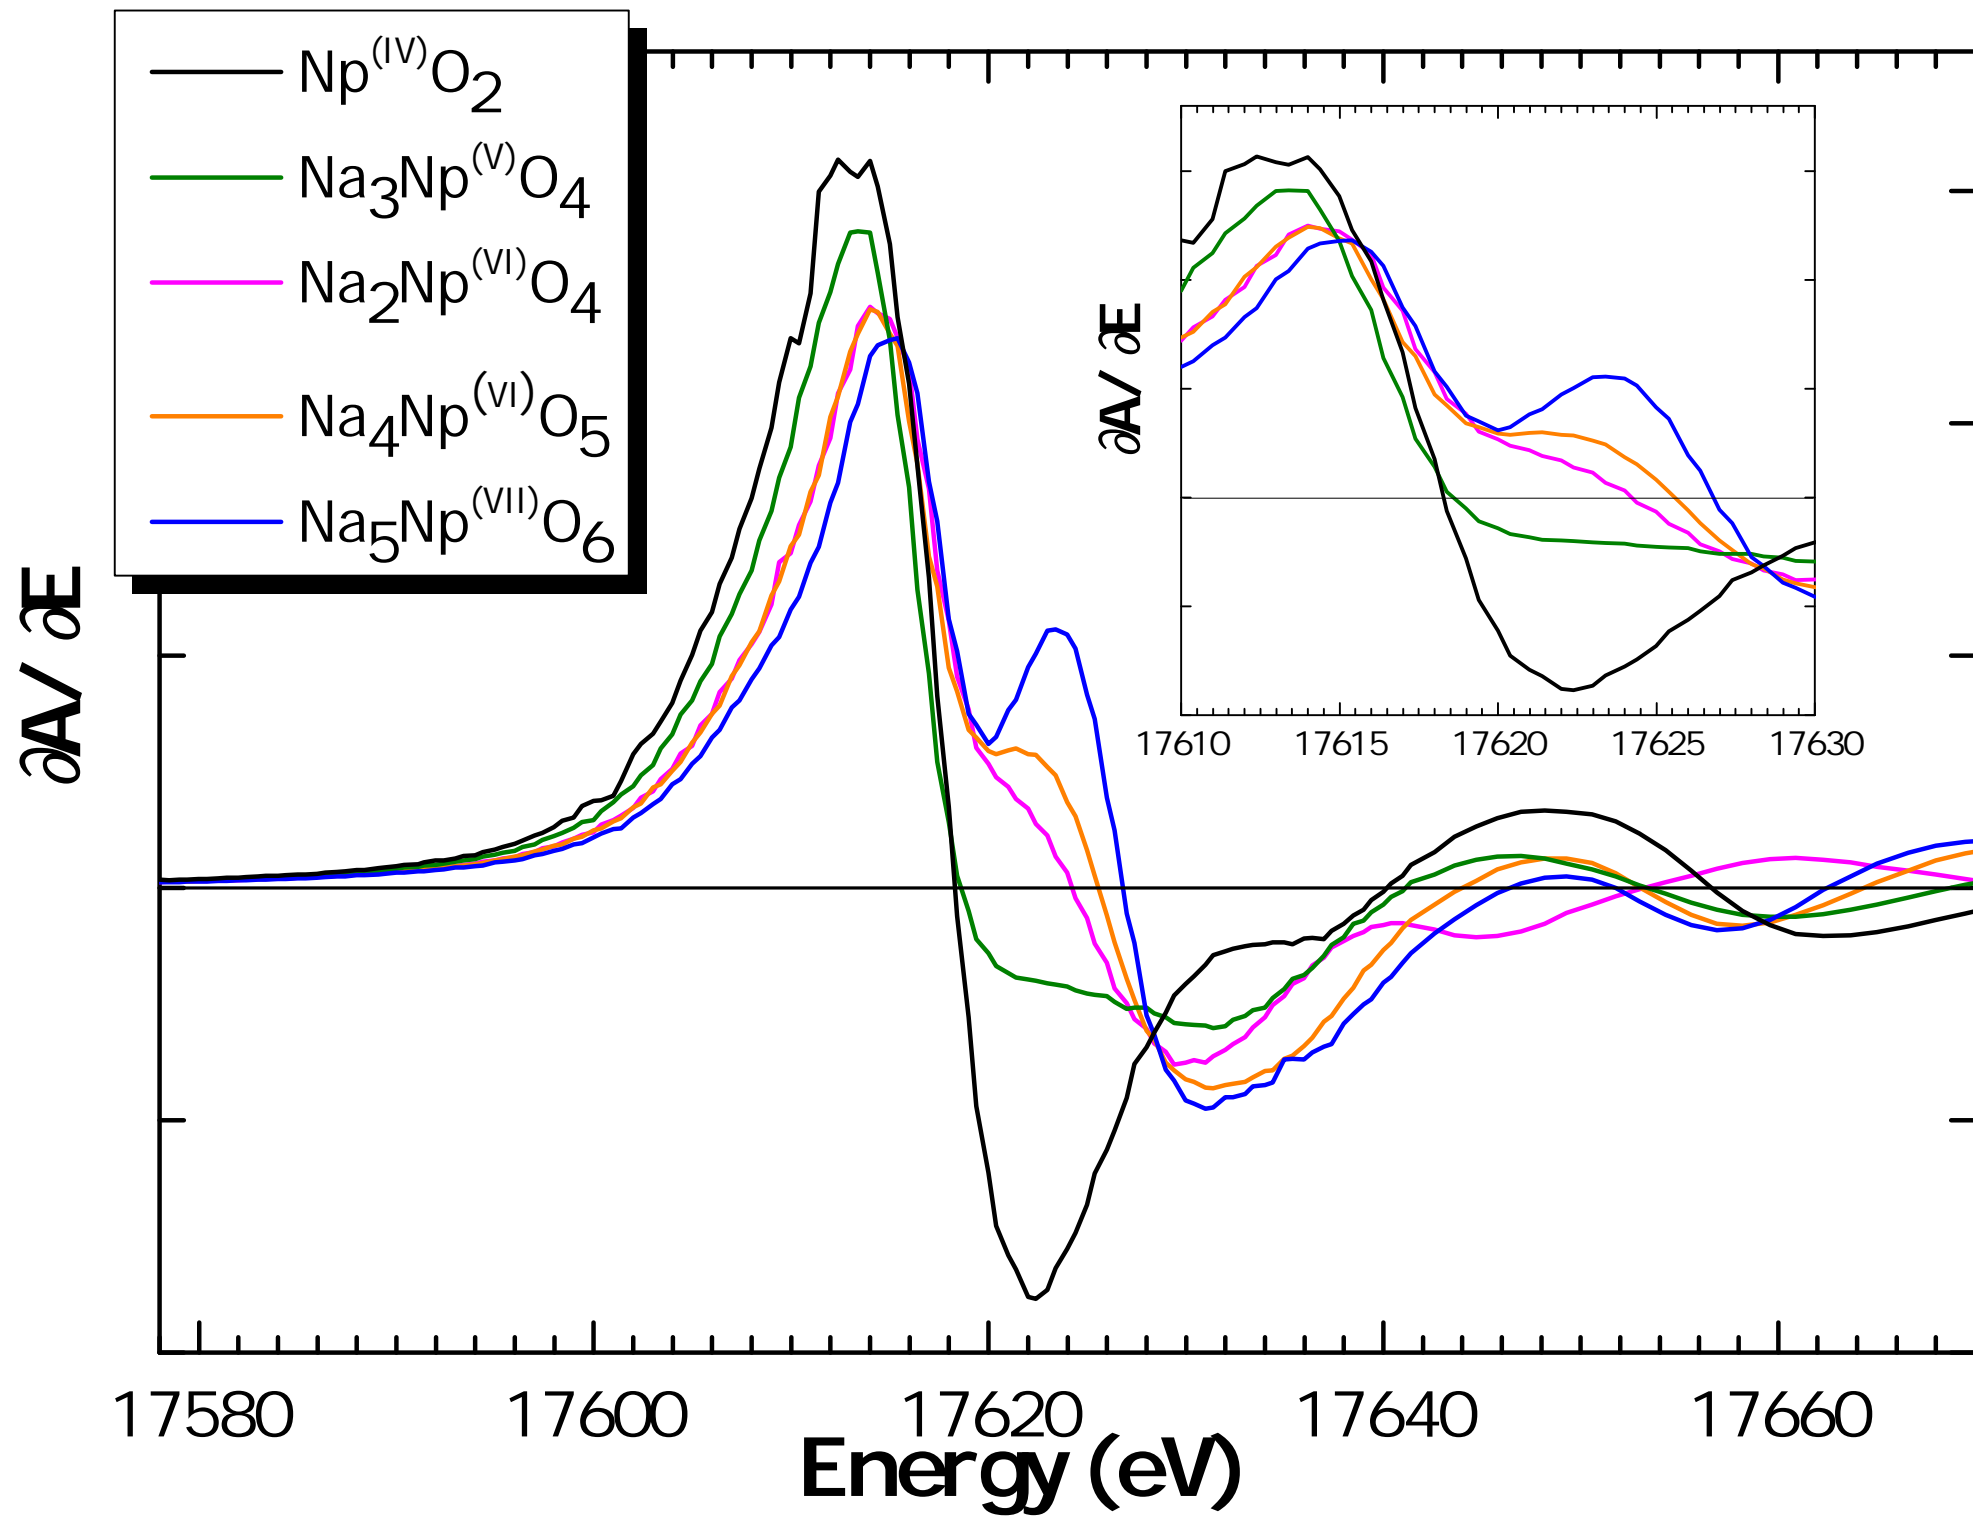

Supplement: Supplementary file 14 [file 3708193]
